# Supplementary material
Source: publisher site journal article supplement (https://www.dovepress.com/article/584999)
Supplement: Supplementary file 1 [file 584999%20Revised%20Supplementary%20Material.pdf]

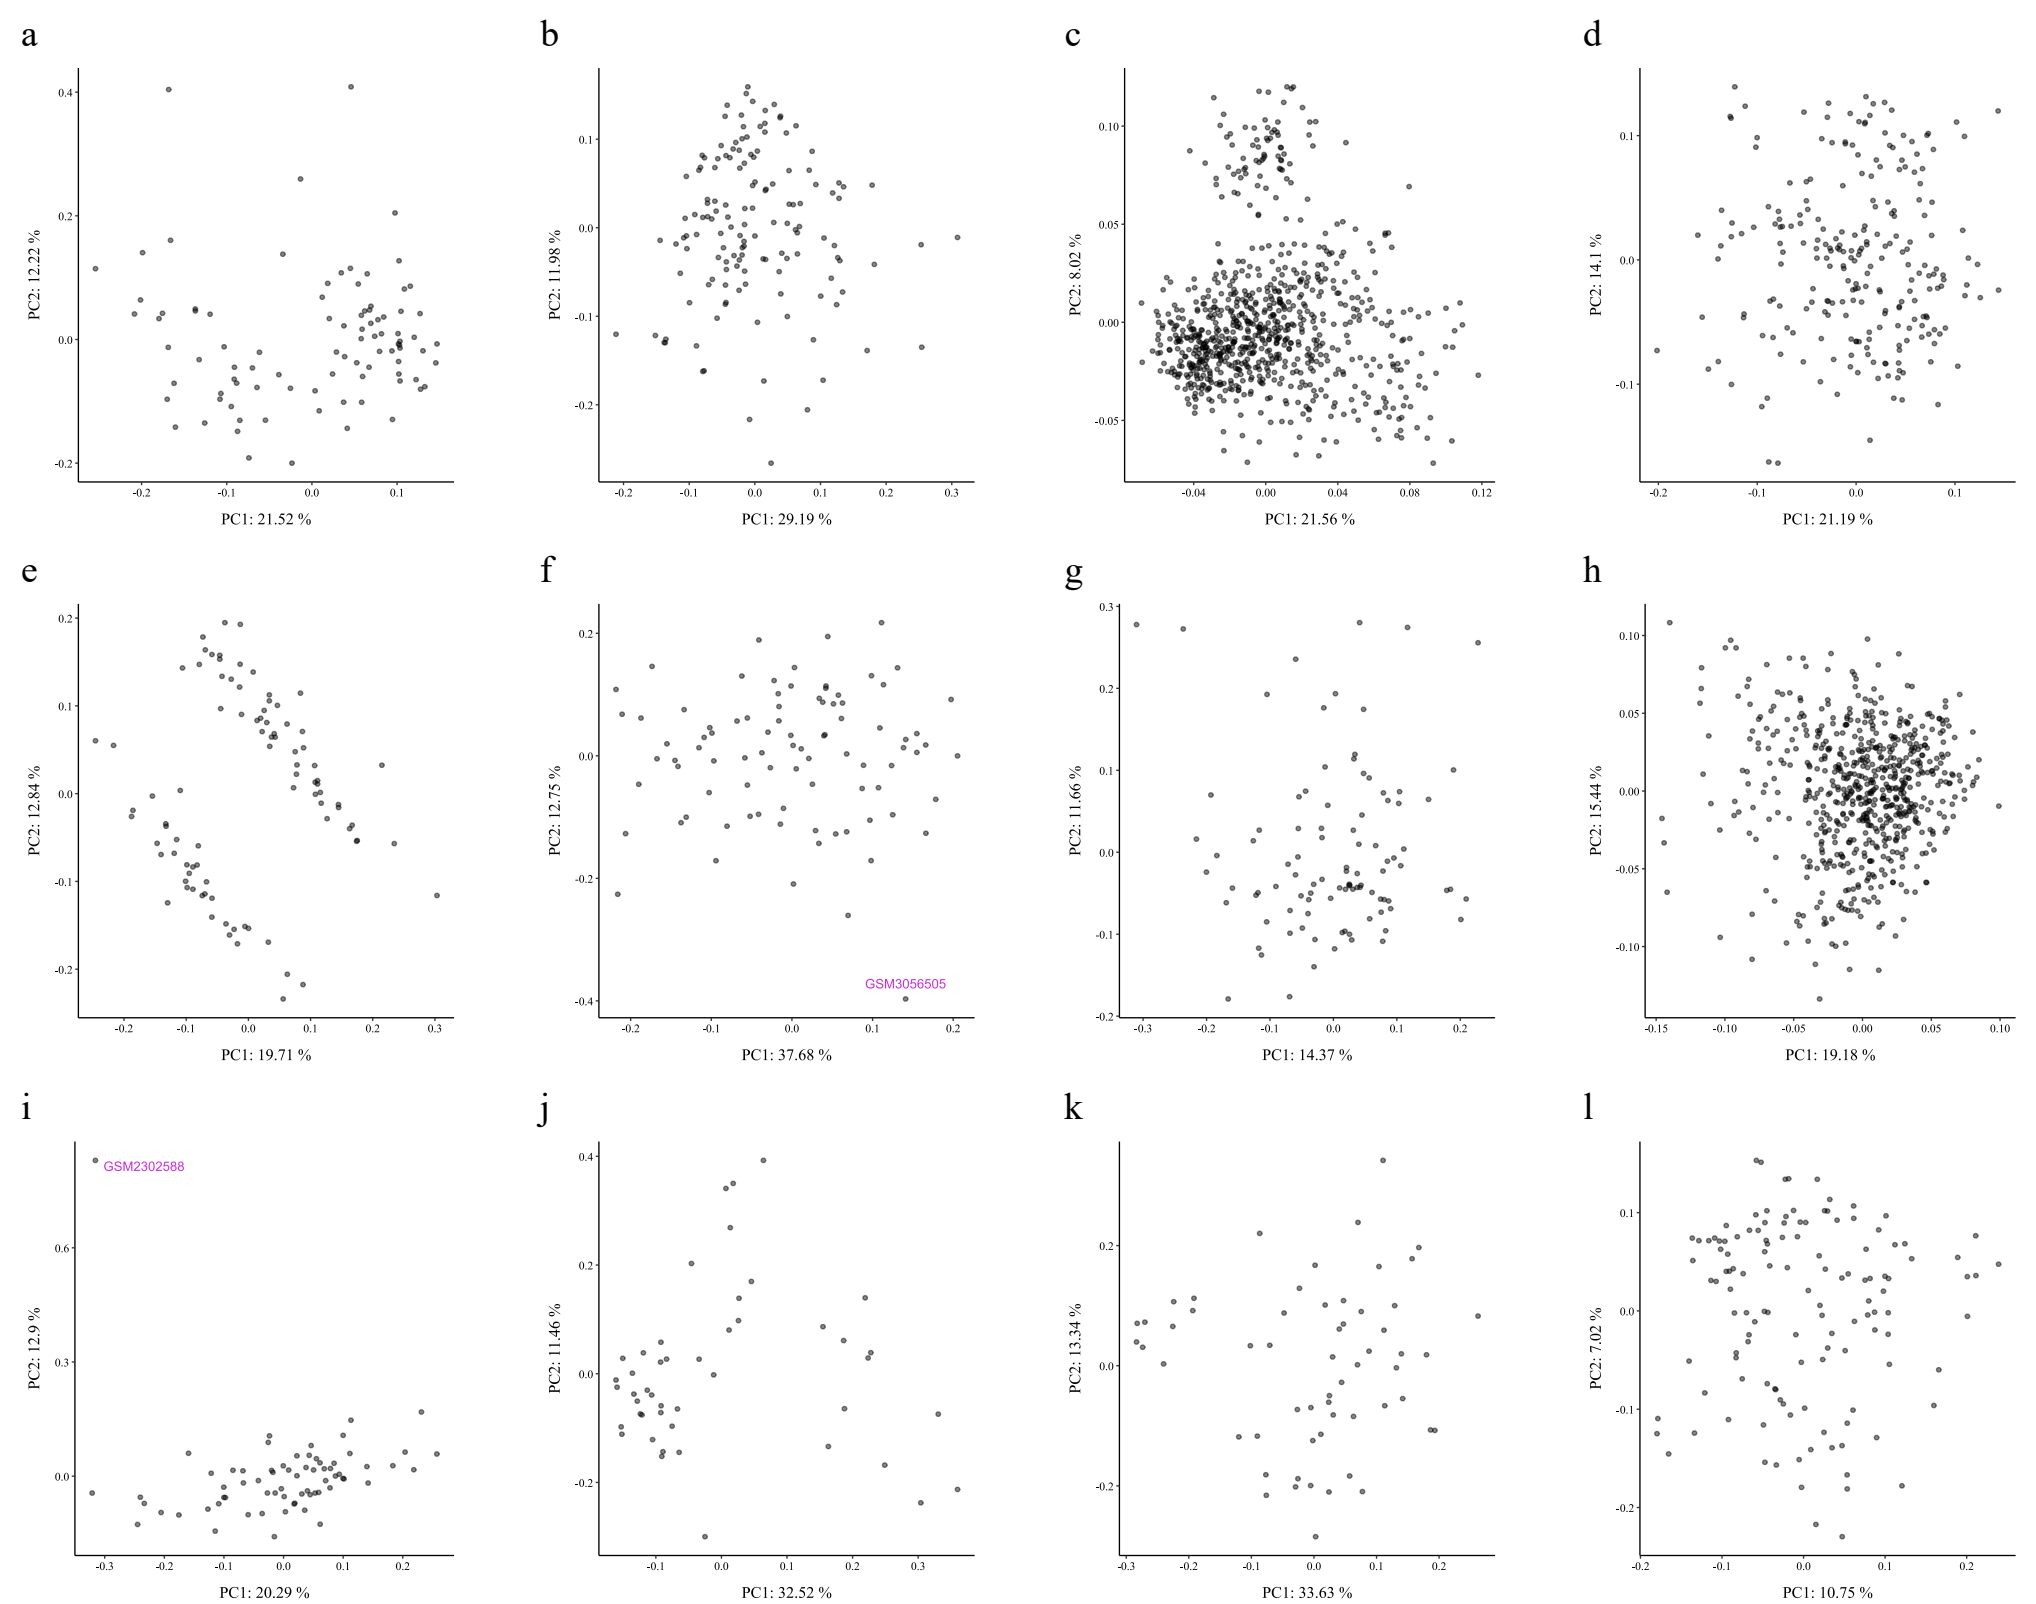

**Supplementary Figure S1.** Outlier detection using principal component analysis (PCA) in **(a)** GSE276395, **(b)** GSE169568, **(c)** GSE177044, **(d)** GSE119600, **(e)** GSE126124, **(f)** GSE112057, **(g)** GSE94648, **(h)** GSE100833, **(i)** GSE86434, **(j)** GSE71730, **(k)** GSE33943, and **(l)** GSE3365. Outliers are demonstrated with a pink label.

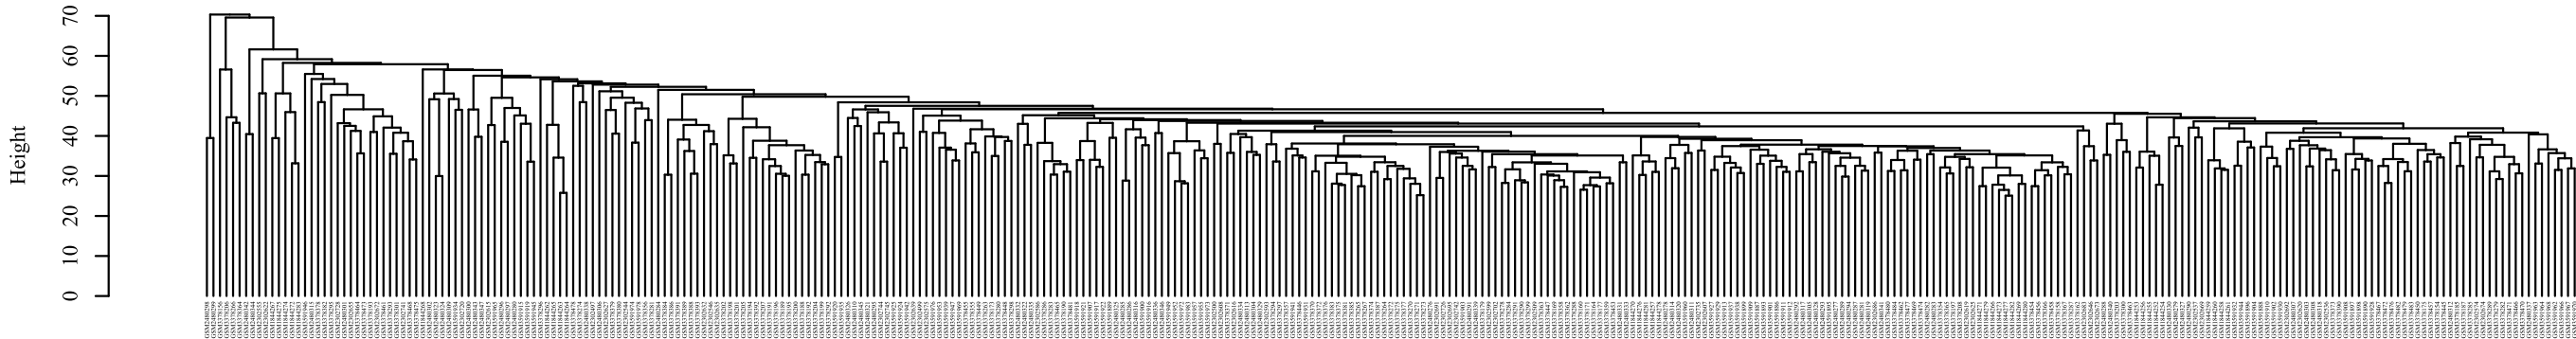

**Supplementary Figure S2.** Hierarchical clustering of samples in the integrated data, which includes samples from patients with CD and HCs.



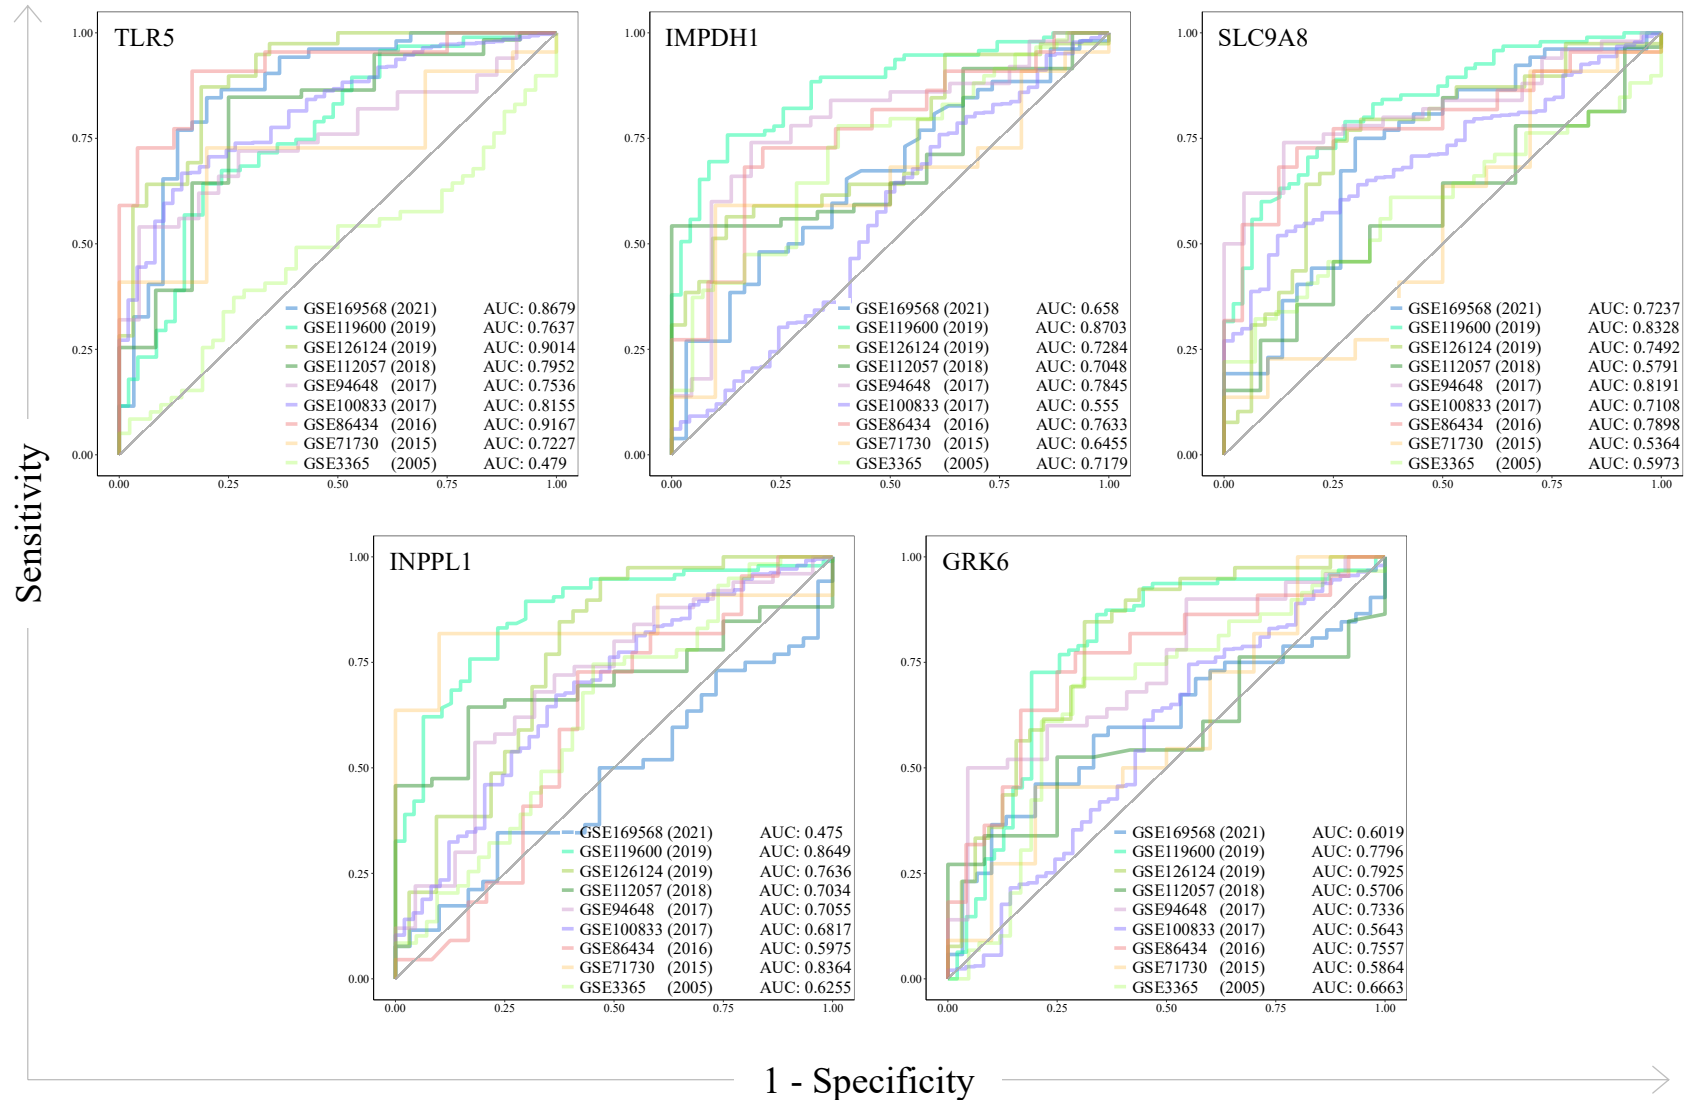

**Supplementary Figure S4.** ROC analysis of the diagnostic efficacy of *TLR5*, *IMPDH1*, *SLC9A8*, *INPPL1*, and *GRK6* for CD across the datasets.

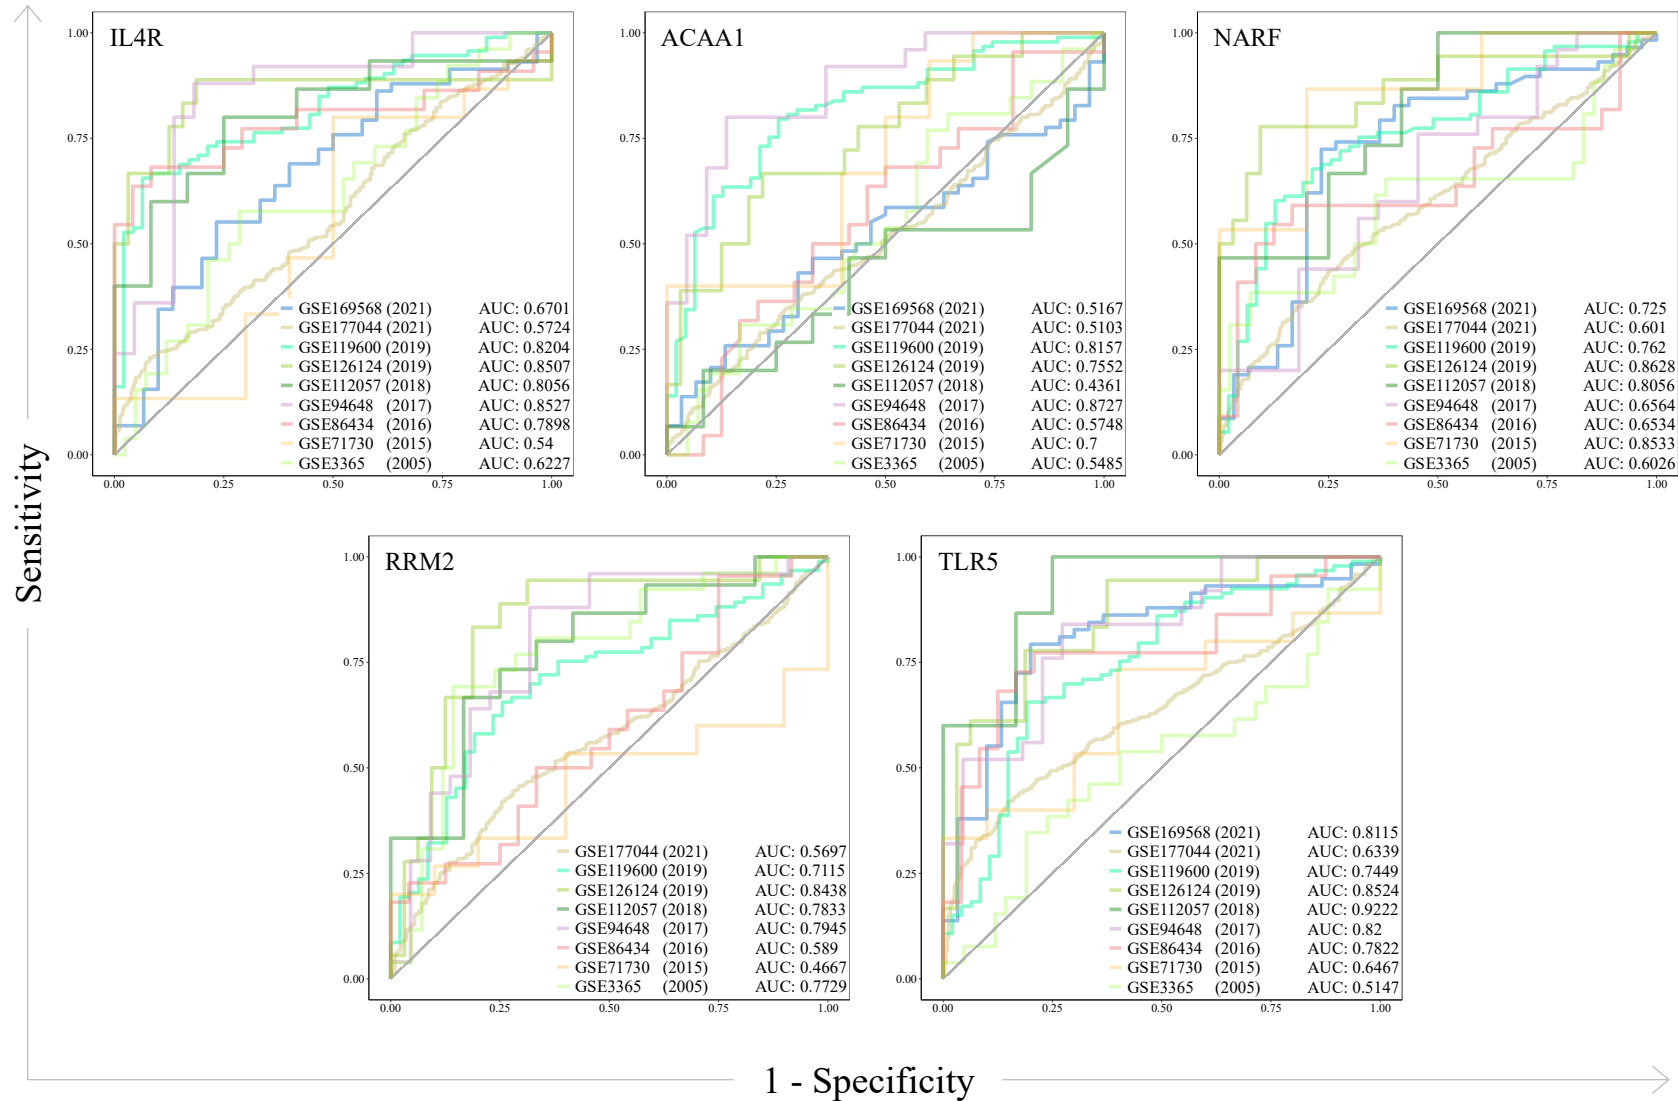

**Supplementary Figure S5.** ROC analysis of the diagnostic efficacy of *IL4R*, *ACAA1*, *NARF*, *RRM2*, and *TLR5* for UC across the datasets.

**Supplementary Table S1.** Upregulated genes in Crohn's disease.

| Gene            | logFC       | adj.P.Val   | Mean expression in controls | Mean expression in CD patients |
|-----------------|-------------|-------------|-----------------------------|--------------------------------|
| <i>FCGR1A</i>   | 1.035702968 | 4.43797E-19 | 8.131961117                 | 9.167664085                    |
| <i>CD177</i>    | 0.858452814 | 1.88348E-09 | 6.07250708                  | 6.930959893                    |
| <i>ANXA3</i>    | 0.856767902 | 2.77421E-13 | 8.125749632                 | 8.982517534                    |
| <i>ALPL</i>     | 0.814745755 | 1.60761E-13 | 9.958293905                 | 10.77303966                    |
| <i>TLR5</i>     | 0.796374023 | 6.82661E-20 | 8.263478218                 | 9.059852241                    |
| <i>FCGR1B</i>   | 0.787873321 | 8.32584E-15 | 7.888073577                 | 8.675946897                    |
| <i>ANKRD22</i>  | 0.783516023 | 1.92758E-11 | 6.840863036                 | 7.624379059                    |
| <i>SLC26A8</i>  | 0.7670078   | 6.82661E-20 | 6.568113749                 | 7.335121549                    |
| <i>HP</i>       | 0.743920014 | 2.2529E-12  | 6.785310025                 | 7.529230039                    |
| <i>MMP9</i>     | 0.737838135 | 2.40783E-08 | 10.02939013                 | 10.76722826                    |
| <i>S100A12</i>  | 0.651938039 | 5.23493E-06 | 9.975468796                 | 10.62740683                    |
| <i>DYSF</i>     | 0.641507053 | 8.98539E-14 | 10.18725725                 | 10.8287643                     |
| <i>KCNJ15</i>   | 0.603569296 | 1.19965E-15 | 7.972306456                 | 8.575875752                    |
| <i>GYG1</i>     | 0.592231936 | 4.91796E-15 | 9.871870517                 | 10.46410245                    |
| <i>RAP1GAP</i>  | 0.58474913  | 0.000337229 | 6.950829305                 | 7.535578435                    |
| <i>HK3</i>      | 0.58263908  | 6.48532E-15 | 8.657058716                 | 9.239697796                    |
| <i>ADM</i>      | 0.569691133 | 3.69309E-10 | 9.951953946                 | 10.52164508                    |
| <i>AIM2</i>     | 0.561743271 | 1.7545E-13  | 7.956836702                 | 8.518579973                    |
| <i>PGLYRP1</i>  | 0.540046477 | 2.42414E-07 | 8.590944298                 | 9.130990775                    |
| <i>MMP8</i>     | 0.538419726 | 2.32537E-06 | 5.477095233                 | 6.015514959                    |
| <i>IL18RAP</i>  | 0.538301172 | 7.53315E-08 | 10.24726668                 | 10.78556785                    |
| <i>OLFM4</i>    | 0.520915419 | 0.000349155 | 6.369860154                 | 6.890775574                    |
| <i>PFKFB3</i>   | 0.516663273 | 4.47101E-10 | 9.582449998                 | 10.09911327                    |
| <i>DSC2</i>     | 0.515802539 | 2.25412E-11 | 7.128879515                 | 7.644682054                    |
| <i>ZNF438</i>   | 0.514868383 | 2.7377E-17  | 7.354495773                 | 7.869364156                    |
| <i>KREMEN1</i>  | 0.509234472 | 4.43797E-19 | 6.341041584                 | 6.850276056                    |
| <i>CA4</i>      | 0.508717522 | 1.90986E-08 | 7.982965327                 | 8.491682849                    |
| <i>LTF</i>      | 0.503697225 | 6.74823E-05 | 7.321396557                 | 7.825093782                    |
| <i>F5</i>       | 0.497880708 | 2.89689E-09 | 8.193440198                 | 8.691320907                    |
| <i>GPR97</i>    | 0.493460413 | 3.47364E-12 | 7.902093043                 | 8.395553457                    |
| <i>NCF4</i>     | 0.488450904 | 1.19965E-15 | 9.884838122                 | 10.37328903                    |
| <i>PGS1</i>     | 0.485530455 | 1.84564E-14 | 8.923383007                 | 9.408913462                    |
| <i>IL4R</i>     | 0.481081791 | 2.37497E-16 | 9.157573814                 | 9.638655605                    |
| <i>ROPNIL</i>   | 0.478826078 | 1.4522E-10  | 7.698934839                 | 8.177760917                    |
| <i>OPLAH</i>    | 0.478521027 | 4.59244E-13 | 6.382304879                 | 6.860825906                    |
| <i>MCTP2</i>    | 0.476261634 | 5.95613E-14 | 7.784348385                 | 8.260610019                    |
| <i>ARG1</i>     | 0.473112306 | 2.72158E-05 | 6.467726472                 | 6.940838778                    |
| <i>BATF2</i>    | 0.473066662 | 3.55968E-09 | 6.600992081                 | 7.074058744                    |
| <i>CACNA1E</i>  | 0.472486578 | 4.11357E-16 | 5.74061142                  | 6.213097998                    |
| <i>ALAS2</i>    | 0.472303496 | 2.22874E-07 | 10.55198248                 | 11.02428598                    |
| <i>PROK2</i>    | 0.471592991 | 7.90505E-08 | 10.68359468                 | 11.15518767                    |
| <i>SERPING1</i> | 0.467417893 | 1.02621E-06 | 6.94823059                  | 7.415648483                    |
| <i>GBP5</i>     | 0.466023667 | 2.66512E-06 | 9.783900438                 | 10.2499241                     |
| <i>FES</i>      | 0.464927499 | 8.01823E-17 | 8.776010839                 | 9.240938338                    |
| <i>SRPK1</i>    | 0.464547779 | 2.73107E-14 | 8.898342891                 | 9.36289067                     |
| <i>MAPK14</i>   | 0.463999248 | 2.7377E-17  | 7.740514768                 | 8.204514016                    |
| <i>PSTPIP2</i>  | 0.460976621 | 3.99166E-09 | 8.917674192                 | 9.378650813                    |
| <i>NLRC4</i>    | 0.460923283 | 2.07897E-12 | 7.442222912                 | 7.903146195                    |
| <i>GK</i>       | 0.458783807 | 5.29464E-09 | 8.929831224                 | 9.38861503                     |
| <i>SLC22A4</i>  | 0.458436843 | 5.00323E-08 | 8.169194021                 | 8.627630864                    |
| <i>LILRA5</i>   | 0.457306518 | 2.89689E-09 | 8.354118687                 | 8.811425205                    |
| <i>GALNT14</i>  | 0.454234023 | 8.98539E-14 | 6.288717116                 | 6.742951139                    |
| <i>CD274</i>    | 0.45331462  | 4.52701E-09 | 6.339293108                 | 6.792607728                    |
| <i>SIPA1L2</i>  | 0.451623074 | 1.26711E-07 | 7.949583087                 | 8.401206162                    |
| <i>TYMP</i>     | 0.450554337 | 7.80382E-13 | 8.434345535                 | 8.884899872                    |
| <i>IL18R1</i>   | 0.444658373 | 1.26283E-07 | 8.059171477                 | 8.50382985                     |

|                |             |             |             |             |
|----------------|-------------|-------------|-------------|-------------|
| <i>SLC37A3</i> | 0.441847494 | 8.25051E-13 | 7.566352627 | 8.008200121 |
| <i>TLR8</i>    | 0.438073527 | 2.71424E-08 | 9.160627174 | 9.598700701 |
| <i>GBP1</i>    | 0.438038761 | 1.65575E-06 | 9.156838528 | 9.59487729  |
| <i>LMNB1</i>   | 0.436912663 | 2.12218E-09 | 8.427830474 | 8.864743137 |
| <i>EPST11</i>  | 0.436166243 | 8.91768E-05 | 9.038947032 | 9.475113275 |
| <i>CEACAM1</i> | 0.434954302 | 4.17654E-08 | 7.745222219 | 8.180176521 |
| <i>PYGL</i>    | 0.430628575 | 4.02647E-09 | 10.55706083 | 10.9876894  |
| <i>GPR84</i>   | 0.428625415 | 9.24407E-06 | 6.472789294 | 6.901414708 |
| <i>OSM</i>     | 0.425675829 | 1.36622E-10 | 6.783064928 | 7.208740757 |
| <i>FFAR2</i>   | 0.425445264 | 6.26374E-07 | 9.747138291 | 10.17258355 |
| <i>CLEC4D</i>  | 0.424831622 | 9.88386E-07 | 7.29097753  | 7.715809152 |
| <i>BCL6</i>    | 0.42423353  | 1.00487E-08 | 10.196683   | 10.62091653 |
| <i>ALOX5</i>   | 0.423055315 | 1.50609E-14 | 9.813512016 | 10.23656733 |
| <i>ALPK1</i>   | 0.421740575 | 2.7194E-11  | 8.405522838 | 8.827263412 |
| <i>SIGLEC5</i> | 0.420297581 | 1.77805E-10 | 8.073157291 | 8.493454872 |
| <i>IFITM3</i>  | 0.418620812 | 0.000336548 | 10.7829309  | 11.20155171 |
| <i>NQO2</i>    | 0.413638479 | 3.30573E-07 | 8.444110522 | 8.857749002 |
| <i>NBEAL2</i>  | 0.410047602 | 2.02699E-15 | 8.384418006 | 8.794465609 |
| <i>SEMA4A</i>  | 0.409471111 | 1.50548E-11 | 8.985379636 | 9.394850747 |
| <i>ACSL1</i>   | 0.409123558 | 7.51672E-06 | 11.07606785 | 11.48519141 |
| <i>HSPA6</i>   | 0.408091891 | 1.5375E-10  | 9.794753252 | 10.20284514 |
| <i>GBP2</i>    | 0.40803286  | 3.76475E-11 | 11.27151496 | 11.67954782 |
| <i>VNN1</i>    | 0.407541715 | 8.98179E-06 | 7.461649956 | 7.869191671 |
| <i>LPCAT2</i>  | 0.40553152  | 9.45262E-07 | 7.851718969 | 8.257250489 |
| <i>LIMK2</i>   | 0.404872187 | 4.59244E-13 | 7.786082083 | 8.19095427  |
| <i>CRI</i>     | 0.402566607 | 4.99941E-10 | 7.24722946  | 7.649796067 |
| <i>MMP25</i>   | 0.40114211  | 1.49378E-07 | 9.60002801  | 10.00117012 |
| <i>ST3GAL4</i> | 0.401125075 | 9.07976E-13 | 6.713910628 | 7.115035702 |
| <i>PARP9</i>   | 0.400178699 | 1.89653E-10 | 9.341238827 | 9.741417526 |
| <i>TCN1</i>    | 0.398399938 | 8.31716E-06 | 7.078883023 | 7.477282961 |
| <i>DHRS13</i>  | 0.398363296 | 1.60704E-10 | 8.227994282 | 8.626357578 |
| <i>CAMP</i>    | 0.398354579 | 0.000155958 | 8.815448239 | 9.213802818 |
| <i>STAT1</i>   | 0.397175668 | 9.28992E-10 | 10.59434103 | 10.9915167  |
| <i>RAB24</i>   | 0.392769698 | 4.55729E-16 | 9.537403585 | 9.930173283 |
| <i>PADI4</i>   | 0.391334149 | 5.11773E-07 | 9.508143594 | 9.899477744 |
| <i>ZDHHC19</i> | 0.39130651  | 1.02188E-05 | 6.468977099 | 6.860283609 |
| <i>SLC9A8</i>  | 0.38800315  | 4.01374E-14 | 8.335170551 | 8.7231737   |
| <i>LHFPL2</i>  | 0.388001194 | 2.50852E-07 | 7.909374853 | 8.297376047 |
| <i>PHTF1</i>   | 0.387575351 | 6.23811E-12 | 7.34051662  | 7.728091971 |
| <i>TRIM25</i>  | 0.384398535 | 2.76435E-10 | 9.160502763 | 9.544901298 |
| <i>ITGAM</i>   | 0.382087613 | 2.34565E-09 | 10.12932605 | 10.51141366 |
| <i>ZNF467</i>  | 0.380238058 | 2.07897E-12 | 9.437153037 | 9.817391095 |
| <i>FLOT2</i>   | 0.379924296 | 7.57881E-15 | 10.98229231 | 11.36221661 |
| <i>LPAR2</i>   | 0.379033311 | 8.09223E-11 | 9.045355557 | 9.424388868 |
| <i>NSUN7</i>   | 0.378644401 | 1.40731E-09 | 6.358838235 | 6.737482636 |
| <i>HCK</i>     | 0.378363838 | 1.40855E-09 | 10.61321141 | 10.99157525 |
| <i>SHKBP1</i>  | 0.378125283 | 8.19822E-13 | 8.769828384 | 9.147953667 |
| <i>TDRD9</i>   | 0.377664121 | 1.64217E-06 | 6.346669074 | 6.724333195 |
| <i>SLC12A9</i> | 0.374097561 | 6.78259E-14 | 9.05796393  | 9.432061491 |
| <i>VCAN</i>    | 0.373442886 | 3.94296E-05 | 10.81109478 | 11.18453766 |
| <i>CREB5</i>   | 0.371861558 | 3.1648E-11  | 8.010162315 | 8.382023873 |
| <i>CST7</i>    | 0.371369312 | 0.000115676 | 10.46708295 | 10.83845226 |
| <i>SAMD9L</i>  | 0.371281273 | 5.55072E-07 | 9.025986807 | 9.397268079 |
| <i>TSPO</i>    | 0.368651949 | 7.84142E-12 | 10.79161228 | 11.16026423 |
| <i>QPCT</i>    | 0.367678988 | 2.1371E-07  | 9.548193588 | 9.915872576 |
| <i>PGD</i>     | 0.367520386 | 2.92373E-12 | 9.798157043 | 10.16567743 |
| <i>FOLR3</i>   | 0.367310697 | 0.003864975 | 9.063981941 | 9.431292638 |
| <i>NAIP</i>    | 0.363352548 | 1.4919E-10  | 7.5811907   | 7.944543248 |
| <i>IGJ</i>     | 0.363184212 | 0.006786902 | 9.106085538 | 9.46926975  |

|                 |             |             |             |             |
|-----------------|-------------|-------------|-------------|-------------|
| <i>BMX</i>      | 0.362778521 | 1.48597E-09 | 6.189094977 | 6.551873498 |
| <i>SLC11A1</i>  | 0.361873141 | 5.65983E-07 | 9.262345272 | 9.624218413 |
| <i>IFIT3</i>    | 0.360559926 | 0.001756823 | 9.049438405 | 9.409998331 |
| <i>SCO2</i>     | 0.359566973 | 9.50105E-10 | 8.674233667 | 9.03380064  |
| <i>RGL4</i>     | 0.35873212  | 4.81636E-07 | 8.650230568 | 9.008962688 |
| <i>NARF</i>     | 0.35826692  | 4.88771E-15 | 8.786423734 | 9.144690654 |
| <i>IFI35</i>    | 0.358033093 | 1.78313E-07 | 9.014895851 | 9.372928944 |
| <i>P2RX1</i>    | 0.356911418 | 6.56161E-10 | 8.212461168 | 8.569372586 |
| <i>GLT1D1</i>   | 0.356592572 | 2.52408E-11 | 8.092159316 | 8.448751889 |
| <i>PFKFB4</i>   | 0.35646404  | 4.60384E-10 | 9.105617224 | 9.462081265 |
| <i>TAP1</i>     | 0.356089885 | 3.49533E-11 | 11.09313322 | 11.4492231  |
| <i>LCN2</i>     | 0.355102387 | 0.008600013 | 9.047374203 | 9.40247659  |
| <i>CD14</i>     | 0.354707345 | 4.73335E-05 | 11.87212179 | 12.22682914 |
| <i>LRG1</i>     | 0.354122798 | 1.42072E-05 | 8.857271309 | 9.211394107 |
| <i>CEACAM8</i>  | 0.353737012 | 0.014405884 | 7.358682932 | 7.712419944 |
| <i>ENTPD1</i>   | 0.352257611 | 5.30109E-14 | 8.530765892 | 8.883023503 |
| <i>GBGT1</i>    | 0.349854115 | 2.17251E-12 | 7.855549611 | 8.205403726 |
| <i>PLSCR1</i>   | 0.349004297 | 1.14048E-05 | 7.530979108 | 7.879983405 |
| <i>MKNK1</i>    | 0.348010181 | 2.10229E-11 | 8.592075648 | 8.94008583  |
| <i>RAB31</i>    | 0.345307407 | 1.56504E-11 | 11.05441178 | 11.39971918 |
| <i>DEFA4</i>    | 0.344046813 | 0.028899786 | 7.542254317 | 7.88630113  |
| <i>TKT</i>      | 0.343657208 | 7.80382E-13 | 11.03597882 | 11.37963603 |
| <i>SLC2A3</i>   | 0.343320396 | 2.22874E-07 | 11.76618566 | 12.10950605 |
| <i>BPI</i>      | 0.34243152  | 9.22295E-05 | 6.601172576 | 6.943604096 |
| <i>TNFRSF17</i> | 0.340744669 | 0.000218178 | 6.564834528 | 6.905579197 |
| <i>CLEC5A</i>   | 0.339906385 | 9.93359E-05 | 6.633761208 | 6.973667593 |
| <i>MVP</i>      | 0.339389844 | 1.19965E-15 | 9.236772468 | 9.576162312 |
| <i>MYBPC3</i>   | 0.339109241 | 1.32003E-09 | 7.05870626  | 7.397815501 |
| <i>SBNO2</i>    | 0.336299236 | 3.38897E-11 | 7.739237612 | 8.075536848 |
| <i>NLRP12</i>   | 0.333985227 | 1.4305E-10  | 8.615806304 | 8.949791531 |
| <i>XK</i>       | 0.332512121 | 0.00360452  | 7.615993854 | 7.948505974 |
| <i>TNFAIP6</i>  | 0.331833376 | 0.005356965 | 8.384709461 | 8.716542837 |
| <i>ETV7</i>     | 0.331822141 | 5.00883E-06 | 6.268591559 | 6.600413699 |
| <i>IMPDH1</i>   | 0.33166837  | 2.33105E-16 | 8.565631682 | 8.897300052 |
| <i>WARS</i>     | 0.33007352  | 7.28629E-06 | 9.964591885 | 10.2946654  |
| <i>OSCAR</i>    | 0.328625544 | 2.01257E-11 | 8.762808308 | 9.091433853 |
| <i>PLEK2</i>    | 0.328251234 | 0.000436982 | 7.700346255 | 8.028597489 |
| <i>VNN2</i>     | 0.327506312 | 5.57557E-07 | 11.06651024 | 11.39401656 |
| <i>IRAK3</i>    | 0.327440742 | 3.64049E-05 | 8.425865648 | 8.75330639  |
| <i>CEACAM3</i>  | 0.326627995 | 2.34565E-09 | 7.975551886 | 8.302179881 |
| <i>HAUS4</i>    | 0.325635049 | 1.66209E-11 | 8.902346628 | 9.227981677 |
| <i>EMRI</i>     | 0.32547621  | 1.00476E-07 | 7.965107948 | 8.290584159 |
| <i>TLR6</i>     | 0.325387963 | 2.58983E-09 | 8.381962345 | 8.707350307 |
| <i>SIAH2</i>    | 0.324410343 | 0.000474469 | 8.881428443 | 9.205838785 |
| <i>LTB4R</i>    | 0.323586823 | 8.09223E-11 | 7.691904578 | 8.015491402 |
| <i>CA1</i>      | 0.3228911   | 0.046471842 | 8.622073834 | 8.944964933 |
| <i>TSTA3</i>    | 0.322410052 | 0.000518892 | 8.283315407 | 8.60572546  |
| <i>CASP5</i>    | 0.322194072 | 8.61585E-05 | 7.045986665 | 7.368180738 |
| <i>IRF1</i>     | 0.321997838 | 3.20872E-11 | 11.35690171 | 11.67889955 |
| <i>TLR4</i>     | 0.32189313  | 4.15325E-06 | 8.673845076 | 8.995738206 |
| <i>TMEM158</i>  | 0.321701668 | 0.011338163 | 8.752271997 | 9.073973665 |
| <i>ELANE</i>    | 0.321536716 | 0.011067466 | 7.093911176 | 7.415447892 |
| <i>SLC22A15</i> | 0.320499838 | 5.43431E-08 | 7.576225576 | 7.896725414 |
| <i>EIF4E3</i>   | 0.320287879 | 2.92373E-12 | 9.438572901 | 9.75886078  |
| <i>DHRS12</i>   | 0.319501779 | 1.71516E-14 | 7.167581064 | 7.487082843 |
| <i>GRN</i>      | 0.31885053  | 4.07421E-10 | 10.32002416 | 10.63887469 |
| <i>STX3</i>     | 0.318541607 | 2.10643E-08 | 9.435470876 | 9.754012483 |
| <i>GBA</i>      | 0.317400914 | 1.71516E-14 | 8.214856958 | 8.532257872 |
| <i>ORM1</i>     | 0.317183514 | 0.007498385 | 7.440149376 | 7.75733289  |

|                 |             |             |             |             |
|-----------------|-------------|-------------|-------------|-------------|
| <i>NFE2</i>     | 0.316798557 | 1.57406E-06 | 10.82074242 | 11.13754097 |
| <i>FRAT2</i>    | 0.315437376 | 1.5375E-10  | 11.05266405 | 11.36810143 |
| <i>BASPI</i>    | 0.315193828 | 5.4007E-07  | 11.54734144 | 11.86253527 |
| <i>GCA</i>      | 0.313591465 | 3.21342E-06 | 11.48366986 | 11.79726132 |
| <i>SORT1</i>    | 0.313523005 | 1.39289E-08 | 7.91206157  | 8.225584575 |
| <i>SMARCD3</i>  | 0.313299535 | 2.33105E-16 | 6.852246957 | 7.165546492 |
| <i>DUSP3</i>    | 0.31314459  | 1.66209E-11 | 8.771593788 | 9.084738378 |
| <i>SOCS3</i>    | 0.312723478 | 1.29676E-09 | 6.770877981 | 7.083601459 |
| <i>SIGLEC9</i>  | 0.310650754 | 5.58284E-11 | 7.494431176 | 7.80508193  |
| <i>TIMP2</i>    | 0.310465596 | 1.10051E-09 | 9.117527573 | 9.427993169 |
| <i>NOD2</i>     | 0.307766662 | 3.72758E-06 | 8.5538458   | 8.861612462 |
| <i>CYTH4</i>    | 0.307654633 | 7.1251E-11  | 9.877665984 | 10.18532062 |
| <i>MXD3</i>     | 0.305848771 | 7.09213E-14 | 7.268463156 | 7.574311927 |
| <i>TMEM176A</i> | 0.305207788 | 0.024756866 | 7.407904145 | 7.713111933 |
| <i>PLXDC2</i>   | 0.30511727  | 4.26281E-05 | 8.418409972 | 8.723527242 |
| <i>HPSE</i>     | 0.304686183 | 6.80875E-06 | 7.941912521 | 8.246598704 |
| <i>STX11</i>    | 0.304059035 | 3.01175E-07 | 9.647427951 | 9.951486986 |
| <i>MPO</i>      | 0.303627856 | 0.000370432 | 6.389565361 | 6.693193217 |
| <i>PHF21A</i>   | 0.303547649 | 2.04375E-11 | 9.874458426 | 10.17800607 |
| <i>TECPR2</i>   | 0.303438818 | 3.59586E-09 | 7.19127039  | 7.494709208 |
| <i>FUT7</i>     | 0.303174694 | 6.19927E-12 | 6.7191998   | 7.022374494 |
| <i>CCR2</i>     | 0.303002553 | 4.47388E-05 | 7.91268021  | 8.215682763 |
| <i>RNF24</i>    | 0.302845971 | 1.00683E-06 | 9.761150278 | 10.06399625 |
| <i>GRINA</i>    | 0.302293607 | 1.23331E-05 | 8.93170942  | 9.234003027 |
| <i>C17orf62</i> | 0.301620143 | 1.71516E-14 | 9.59852379  | 9.900143934 |
| <i>CIRL</i>     | 0.301546664 | 2.881E-11   | 8.014612433 | 8.316159098 |
| <i>IL17RA</i>   | 0.301215494 | 5.44784E-10 | 9.565917394 | 9.867132888 |
| <i>GADD45B</i>  | 0.301172537 | 5.83222E-13 | 8.653767226 | 8.954939763 |
| <i>ITGA2B</i>   | 0.30095932  | 0.002309779 | 7.447826286 | 7.748785605 |
| <i>FLOT1</i>    | 0.300736331 | 4.85398E-08 | 9.412929514 | 9.713665845 |
| <i>TNFSF10</i>  | 0.300374393 | 7.93717E-09 | 10.57295218 | 10.87332658 |
| <i>TGFA</i>     | 0.299444968 | 1.44585E-07 | 6.977355282 | 7.27680025  |
| <i>DDX60L</i>   | 0.298411384 | 6.01896E-06 | 8.587412183 | 8.885823567 |
| <i>FAM129A</i>  | 0.297787699 | 3.63109E-05 | 11.2607346  | 11.5585223  |
| <i>DGAT2</i>    | 0.297636086 | 2.36953E-07 | 8.027332058 | 8.324968144 |
| <i>JAK2</i>     | 0.296257798 | 5.22018E-08 | 7.691497584 | 7.987755382 |
| <i>FBXO6</i>    | 0.296169631 | 1.18845E-05 | 8.005442205 | 8.301611836 |
| <i>CEACAM6</i>  | 0.29562906  | 0.018526819 | 6.331240776 | 6.626869836 |
| <i>MICAL1</i>   | 0.295582905 | 1.6492E-11  | 8.928162887 | 9.223745792 |
| <i>GRAMD1A</i>  | 0.295455005 | 1.74139E-10 | 9.092860817 | 9.388315822 |
| <i>S100A8</i>   | 0.2946199   | 8.22063E-05 | 12.68201687 | 12.97663677 |
| <i>RNF182</i>   | 0.293187344 | 0.018847338 | 6.155217949 | 6.448405293 |
| <i>PLXNC1</i>   | 0.293028001 | 3.3208E-06  | 8.181717457 | 8.474745458 |
| <i>FNDC3B</i>   | 0.292488201 | 4.42047E-08 | 8.58871031  | 8.881198511 |
| <i>UBXN2B</i>   | 0.291850151 | 1.61518E-08 | 8.794581978 | 9.086432129 |
| <i>TMOD1</i>    | 0.290831183 | 0.007927133 | 8.614083659 | 8.904914843 |
| <i>AQP9</i>     | 0.290141878 | 8.08075E-05 | 12.14680183 | 12.4369437  |
| <i>STX10</i>    | 0.290043791 | 1.4135E-12  | 9.321152277 | 9.611196068 |
| <i>DENND3</i>   | 0.289604311 | 3.62629E-07 | 9.012021583 | 9.301625893 |
| <i>NUCB1</i>    | 0.28943806  | 2.10229E-11 | 10.67978054 | 10.9692186  |
| <i>MLKL</i>     | 0.287920514 | 1.44034E-12 | 9.128813557 | 9.416734071 |
| <i>TRPM6</i>    | 0.287659039 | 5.01393E-07 | 6.97350175  | 7.261160789 |
| <i>SECTMI</i>   | 0.287390697 | 7.84142E-12 | 7.692764245 | 7.980154942 |
| <i>TFDPI</i>    | 0.287285337 | 8.85806E-05 | 8.868586231 | 9.155871568 |
| <i>WIPI1</i>    | 0.286737798 | 2.92428E-07 | 8.017630674 | 8.304368472 |
| <i>GRB10</i>    | 0.286615254 | 4.40478E-09 | 6.407137027 | 6.693752281 |
| <i>DOK3</i>     | 0.284909036 | 1.28876E-08 | 7.801933727 | 8.086842763 |
| <i>PRKCD</i>    | 0.284642228 | 3.70957E-11 | 9.79139806  | 10.07604029 |
| <i>RALB</i>     | 0.28379135  | 3.78884E-07 | 10.31118286 | 10.59497421 |

|                  |             |             |             |             |
|------------------|-------------|-------------|-------------|-------------|
| <i>INPPL1</i>    | 0.283398694 | 6.41488E-14 | 8.533334068 | 8.816732762 |
| <i>AHSP</i>      | 0.282934845 | 0.043956532 | 9.803910055 | 10.0868449  |
| <i>KLHL2</i>     | 0.282899171 | 1.97983E-05 | 8.895782057 | 9.178681228 |
| <i>HIST2H2BE</i> | 0.28286121  | 5.15134E-05 | 9.518582389 | 9.8014436   |
| <i>PQLC1</i>     | 0.282347605 | 2.62311E-09 | 9.51189445  | 9.794242055 |
| <i>HIST1H2BK</i> | 0.281766104 | 8.9002E-06  | 10.46353625 | 10.74530235 |
| <i>TNFSF13B</i>  | 0.28159265  | 5.40086E-06 | 10.44808306 | 10.72967571 |
| <i>ERI1</i>      | 0.281356653 | 1.9687E-11  | 6.75170867  | 7.033065323 |
| <i>FBXL5</i>     | 0.28106876  | 1.63244E-09 | 9.484619041 | 9.765687801 |
| <i>ABTB1</i>     | 0.280734893 | 2.86442E-08 | 9.480887714 | 9.761622607 |
| <i>MYD88</i>     | 0.280669458 | 6.35313E-13 | 10.14308717 | 10.42375663 |
| <i>PADI2</i>     | 0.280634866 | 3.91903E-08 | 7.237608    | 7.518242866 |
| <i>FBXL13</i>    | 0.280143851 | 5.56791E-06 | 6.609342781 | 6.889486633 |
| <i>ILIR2</i>     | 0.279900664 | 0.0080231   | 8.663068235 | 8.942968899 |
| <i>KIF1B</i>     | 0.278562313 | 2.59927E-07 | 7.619858045 | 7.898420358 |
| <i>CRISP3</i>    | 0.278286967 | 0.000120237 | 5.981985729 | 6.260272696 |
| <i>MYO1F</i>     | 0.278125208 | 1.14132E-07 | 9.77070526  | 10.04883047 |
| <i>TRIB1</i>     | 0.275277691 | 4.47099E-08 | 8.132097208 | 8.407374899 |
| <i>MBOAT2</i>    | 0.275056924 | 2.88845E-07 | 7.391927784 | 7.666984708 |
| <i>BCL3</i>      | 0.272953203 | 6.14102E-08 | 8.638110164 | 8.911063367 |
| <i>INSC</i>      | 0.27223257  | 2.23421E-07 | 5.911033244 | 6.183265814 |
| <i>CD38</i>      | 0.271900498 | 5.78654E-05 | 7.20179077  | 7.473691269 |
| <i>LRP10</i>     | 0.27081339  | 3.71079E-08 | 10.89610993 | 11.16692332 |
| <i>FAM126B</i>   | 0.270409986 | 1.20138E-05 | 8.33778984  | 8.608199825 |
| <i>RBCK1</i>     | 0.270302392 | 3.27727E-15 | 9.041545441 | 9.311847833 |
| <i>DRAM1</i>     | 0.270197497 | 3.955E-07   | 7.866775966 | 8.136973463 |
| <i>SH3BP5L</i>   | 0.269929984 | 1.58598E-10 | 8.385706149 | 8.655636133 |
| <i>RGS19</i>     | 0.26931804  | 7.5138E-14  | 9.628814156 | 9.898132195 |
| <i>IRF7</i>      | 0.267837374 | 8.64879E-07 | 8.620209998 | 8.888047372 |
| <i>STAT5B</i>    | 0.267575394 | 1.39053E-09 | 8.984594614 | 9.252170008 |
| <i>REM2</i>      | 0.267236331 | 1.82299E-05 | 7.863693227 | 8.130929558 |
| <i>MME</i>       | 0.266086033 | 4.92051E-05 | 9.020982412 | 9.287068445 |
| <i>CD59</i>      | 0.266042144 | 6.19927E-12 | 7.253314823 | 7.519356967 |
| <i>RHBDF2</i>    | 0.2659167   | 2.23645E-10 | 8.40024371  | 8.66616041  |
| <i>LRRC6</i>     | 0.265894365 | 0.000120062 | 6.616973322 | 6.882867687 |
| <i>ACAA1</i>     | 0.265510775 | 3.90982E-13 | 8.802424626 | 9.067935401 |
| <i>ZYX</i>       | 0.265492216 | 4.75607E-09 | 10.51117144 | 10.77666365 |
| <i>TRIM22</i>    | 0.26536503  | 2.08424E-05 | 10.03519824 | 10.30056327 |
| <i>LRPAP1</i>    | 0.264812618 | 3.41803E-09 | 7.855521526 | 8.120334144 |
| <i>PARP10</i>    | 0.264515561 | 5.40057E-14 | 7.45661796  | 7.721133521 |
| <i>DDAH2</i>     | 0.263281596 | 8.0342E-09  | 7.394274681 | 7.657556276 |
| <i>S100A6</i>    | 0.263240047 | 8.18304E-06 | 10.65852174 | 10.92176178 |
| <i>TCIRG1</i>    | 0.263000437 | 9.14075E-11 | 9.070201535 | 9.333201972 |
| <i>MPP1</i>      | 0.26132035  | 0.002878066 | 11.04650694 | 11.30782728 |
| <i>OXER1</i>     | 0.261197849 | 9.2901E-11  | 7.104620788 | 7.365818637 |
| <i>MNDA</i>      | 0.260948575 | 0.000579109 | 11.36416791 | 11.62511648 |
| <i>CCDC88B</i>   | 0.260822633 | 1.7779E-09  | 7.934935893 | 8.195758526 |
| <i>RHD</i>       | 0.260600976 | 3.67809E-05 | 6.160657601 | 6.421258577 |
| <i>SLC40A1</i>   | 0.260581909 | 1.45938E-07 | 8.975949349 | 9.236531258 |
| <i>SLC25A37</i>  | 0.260515592 | 0.000313496 | 11.72858283 | 11.98909842 |
| <i>GMPR</i>      | 0.260229248 | 0.035797327 | 9.136724365 | 9.396953613 |
| <i>RRM2</i>      | 0.260090543 | 6.53835E-09 | 6.031715152 | 6.291805695 |
| <i>TMCO3</i>     | 0.259375916 | 1.23942E-07 | 7.494247563 | 7.75362348  |
| <i>STEAP4</i>    | 0.2591139   | 9.07503E-05 | 8.078283127 | 8.337397026 |
| <i>MGAM</i>      | 0.258859267 | 0.000639784 | 8.280238722 | 8.539097989 |
| <i>C10orf54</i>  | 0.258387901 | 4.95026E-08 | 10.76834037 | 11.02672827 |
| <i>ZBP1</i>      | 0.258340172 | 2.71631E-05 | 8.886855466 | 9.145195637 |
| <i>LTBR</i>      | 0.258299216 | 1.66209E-11 | 7.817689736 | 8.075988952 |
| <i>S1PR4</i>     | 0.258255355 | 1.42527E-08 | 9.728773259 | 9.987028615 |

|                 |             |             |             |             |
|-----------------|-------------|-------------|-------------|-------------|
| <i>TRAFD1</i>   | 0.257952288 | 3.55341E-09 | 8.660755404 | 8.918707692 |
| <i>NCF1</i>     | 0.257861139 | 3.90468E-05 | 11.03905844 | 11.29691958 |
| <i>THOC5</i>    | 0.257676756 | 6.36461E-14 | 8.077836382 | 8.335513139 |
| <i>PLB1</i>     | 0.257172103 | 7.47586E-08 | 6.32214376  | 6.579315863 |
| <i>NFIL3</i>    | 0.257125512 | 0.00011922  | 9.307348772 | 9.564474284 |
| <i>GNG10</i>    | 0.256412881 | 0.000435963 | 9.797911574 | 10.05432445 |
| <i>NCF2</i>     | 0.25622094  | 0.00010842  | 11.36529644 | 11.62151738 |
| <i>ATP9A</i>    | 0.255981241 | 5.30933E-05 | 6.780136499 | 7.036117739 |
| <i>SQRDL</i>    | 0.255875801 | 2.84734E-09 | 9.067341486 | 9.323217286 |
| <i>NLRC5</i>    | 0.255073263 | 1.83458E-11 | 8.6843662   | 8.939439463 |
| <i>KCTD12</i>   | 0.25487851  | 0.000168295 | 8.938853178 | 9.193731688 |
| <i>TREML2</i>   | 0.254716594 | 3.85209E-07 | 8.002757121 | 8.257473715 |
| <i>UPP1</i>     | 0.253866549 | 5.17905E-07 | 8.717320616 | 8.971187166 |
| <i>WDFY3</i>    | 0.253830071 | 9.93978E-08 | 6.89332393  | 7.147154001 |
| <i>USF1</i>     | 0.253789499 | 1.2098E-07  | 7.692914807 | 7.946704306 |
| <i>AGPAT9</i>   | 0.253677735 | 0.000131774 | 9.224717315 | 9.47839505  |
| <i>PINK1</i>    | 0.253431078 | 3.93339E-05 | 9.03006312  | 9.283494198 |
| <i>HK1</i>      | 0.253396945 | 1.05774E-06 | 9.411649976 | 9.665046922 |
| <i>JUNB</i>     | 0.253392372 | 1.73722E-07 | 9.019349762 | 9.272742134 |
| <i>TMEM120A</i> | 0.253085484 | 5.49096E-07 | 8.627300982 | 8.880386465 |
| <i>RETN</i>     | 0.253050341 | 0.001404765 | 6.896484087 | 7.149534428 |
| <i>HIST1H3F</i> | 0.252982051 | 3.69637E-06 | 6.682240745 | 6.935222796 |
| <i>BEST1</i>    | 0.2527012   | 8.07202E-06 | 7.998143562 | 8.250844762 |
| <i>TMEM176B</i> | 0.25263296  | 0.00769038  | 6.762201082 | 7.014834042 |
| <i>FAM160B1</i> | 0.25251228  | 2.2529E-12  | 7.920683421 | 8.173195701 |
| <i>CRISPLD2</i> | 0.252390643 | 0.00016746  | 9.222956937 | 9.475347581 |
| <i>FCGR2A</i>   | 0.252350528 | 1.85792E-05 | 9.584058487 | 9.836409015 |
| <i>TBC1D2</i>   | 0.252323246 | 3.04604E-08 | 7.687512572 | 7.939835818 |
| <i>ADCY4</i>    | 0.252264117 | 2.87307E-08 | 7.072212159 | 7.324476276 |
| <i>LRRN1</i>    | 0.252232268 | 9.31501E-07 | 5.634193274 | 5.886425542 |
| <i>TIMM10</i>   | 0.252062338 | 0.000431658 | 7.860855254 | 8.112917592 |
| <i>BRI3</i>     | 0.250995501 | 1.07503E-06 | 9.79729699  | 10.04829249 |
| <i>MXD1</i>     | 0.250831424 | 5.61645E-05 | 11.1926036  | 11.44343503 |
| <i>APBB3</i>    | 0.250663864 | 1.08231E-07 | 8.081994797 | 8.332658661 |
| <i>DNAJC5</i>   | 0.250403201 | 2.23409E-12 | 8.119979735 | 8.370382937 |
| <i>GSDMD</i>    | 0.249684545 | 3.11515E-09 | 9.128158412 | 9.377842957 |
| <i>PARP14</i>   | 0.249390709 | 9.21829E-05 | 9.402312681 | 9.65170339  |
| <i>BST1</i>     | 0.249210811 | 1.79685E-05 | 8.45131377  | 8.700524581 |
| <i>GLIPR2</i>   | 0.248889473 | 1.40855E-09 | 11.12726266 | 11.37615214 |
| <i>ABCA7</i>    | 0.248359224 | 2.22874E-07 | 7.542519536 | 7.79087876  |
| <i>DACH1</i>    | 0.24831934  | 1.89653E-10 | 5.739166733 | 5.987486073 |
| <i>ARHGAP4</i>  | 0.248163691 | 2.53889E-08 | 9.484257174 | 9.732420865 |
| <i>FCN1</i>     | 0.247659039 | 0.001841605 | 12.04316731 | 12.29082635 |
| <i>CAMKK2</i>   | 0.247604545 | 1.88959E-06 | 7.609859722 | 7.857464266 |
| <i>APBB1IP</i>  | 0.247549111 | 2.07855E-08 | 9.988859958 | 10.23640907 |
| <i>CTSG</i>     | 0.247083508 | 0.024749468 | 6.641617426 | 6.888700934 |
| <i>LILRB3</i>   | 0.246289055 | 8.21801E-08 | 11.76984868 | 12.01613773 |
| <i>SH3GLB1</i>  | 0.246037846 | 2.28683E-06 | 10.09594199 | 10.34197983 |
| <i>SLPI</i>     | 0.245736073 | 0.005035835 | 7.584726586 | 7.830462659 |
| <i>EMILIN2</i>  | 0.245367651 | 5.95797E-07 | 9.050096182 | 9.295463833 |
| <i>ACTN1</i>    | 0.245227984 | 1.18501E-06 | 10.2942787  | 10.53950668 |
| <i>HDAC4</i>    | 0.245150243 | 5.38752E-08 | 7.963039414 | 8.208189658 |
| <i>SH3BGRL2</i> | 0.244736822 | 0.005329768 | 8.442633892 | 8.687370714 |
| <i>HIST1H4D</i> | 0.244723974 | 1.43057E-07 | 5.841279966 | 6.08600394  |
| <i>SLC25A44</i> | 0.244672541 | 3.552E-07   | 9.818594977 | 10.06326752 |
| <i>FAM46C</i>   | 0.244306438 | 0.040265804 | 10.79152658 | 11.03583302 |
| <i>CBS</i>      | 0.244208218 | 3.5471E-05  | 6.453174996 | 6.697383214 |
| <i>TXN</i>      | 0.244160675 | 0.002347637 | 10.23163908 | 10.47579975 |
| <i>MBOAT7</i>   | 0.244011254 | 1.19913E-05 | 9.76442085  | 10.0084321  |

|                 |             |             |             |             |
|-----------------|-------------|-------------|-------------|-------------|
| <i>YIPF1</i>    | 0.243771408 | 7.80382E-13 | 9.14033844  | 9.384109849 |
| <i>EIF2AK2</i>  | 0.243281755 | 0.000432491 | 9.134273768 | 9.377555523 |
| <i>AMICA1</i>   | 0.243189631 | 2.75964E-09 | 11.71789612 | 11.96108575 |
| <i>QSOX1</i>    | 0.243180961 | 2.74322E-09 | 7.574367307 | 7.817548269 |
| <i>NADK</i>     | 0.24314174  | 5.19539E-06 | 9.31631851  | 9.55946025  |
| <i>B3GNT8</i>   | 0.242896533 | 8.05742E-10 | 6.784633198 | 7.027529731 |
| <i>IFIT2</i>    | 0.24254075  | 0.006932697 | 10.37098495 | 10.6135257  |
| <i>P2RY14</i>   | 0.24248658  | 0.000304422 | 7.214515016 | 7.457001596 |
| <i>DHRS9</i>    | 0.242465452 | 0.002514147 | 8.201963368 | 8.444428821 |
| <i>RAB32</i>    | 0.241859945 | 5.20124E-06 | 8.667847867 | 8.909707812 |
| <i>SLC2A14</i>  | 0.241798623 | 0.00015499  | 8.315336049 | 8.557134672 |
| <i>LIN7A</i>    | 0.241770257 | 2.25403E-06 | 6.865950885 | 7.107721141 |
| <i>PACSIN2</i>  | 0.24170473  | 3.35502E-08 | 9.120322427 | 9.362027157 |
| <i>ASPHD2</i>   | 0.241668359 | 1.29561E-10 | 7.436733034 | 7.678401393 |
| <i>TOM1</i>     | 0.241575343 | 1.4305E-10  | 8.626786618 | 8.868361961 |
| <i>SIRPD</i>    | 0.241386728 | 8.28337E-08 | 7.090957497 | 7.332344225 |
| <i>VAV1</i>     | 0.241288771 | 4.84351E-08 | 9.176291842 | 9.417580613 |
| <i>GADD45A</i>  | 0.24116606  | 0.001702902 | 7.831028056 | 8.072194116 |
| <i>CTSA</i>     | 0.240902192 | 1.06817E-06 | 9.881163787 | 10.12206598 |
| <i>TLR1</i>     | 0.240855247 | 0.001438854 | 9.399980151 | 9.640835398 |
| <i>ARHGAP9</i>  | 0.240850033 | 1.00547E-08 | 10.81048635 | 11.05133639 |
| <i>NFXL1</i>    | 0.240656491 | 0.007506851 | 7.638464389 | 7.87912088  |
| <i>CEBPB</i>    | 0.240547507 | 9.56064E-06 | 11.93326987 | 12.17381737 |
| <i>MANSC1</i>   | 0.240517529 | 0.00098266  | 7.897228056 | 8.137745585 |
| <i>CDC20</i>    | 0.240401287 | 5.73767E-05 | 6.513446886 | 6.753848172 |
| <i>CMTM2</i>    | 0.240316924 | 0.001695575 | 9.98764059  | 10.22795751 |
| <i>FAM160A2</i> | 0.240243503 | 4.54874E-09 | 8.302270485 | 8.542513988 |
| <i>PLEKH02</i>  | 0.239817402 | 1.13589E-07 | 9.413974849 | 9.653792251 |
| <i>CKAP4</i>    | 0.239639875 | 2.23029E-05 | 9.167124481 | 9.406764356 |
| <i>LILRA3</i>   | 0.238856984 | 0.008888308 | 9.33320873  | 9.572065714 |
| <i>MYOF</i>     | 0.238687244 | 0.004114813 | 7.09214561  | 7.330832854 |
| <i>FRAT1</i>    | 0.238201918 | 1.76226E-07 | 8.442995535 | 8.681197453 |
| <i>CDC34</i>    | 0.238097546 | 0.004150376 | 8.747516455 | 8.985614001 |
| <i>CCPG1</i>    | 0.237661034 | 1.46437E-06 | 8.406932447 | 8.644593481 |
| <i>TMEM140</i>  | 0.23732659  | 4.53822E-05 | 10.39189487 | 10.62922146 |
| <i>REC8</i>     | 0.237261346 | 2.2529E-12  | 7.258108583 | 7.495369928 |
| <i>ORAI2</i>    | 0.236436249 | 1.20066E-09 | 7.27177709  | 7.508213339 |
| <i>SMOX</i>     | 0.236434673 | 0.006558096 | 7.504521388 | 7.740956062 |
| <i>ATG16L2</i>  | 0.235939426 | 8.84349E-05 | 9.087841288 | 9.323780714 |
| <i>CIQB</i>     | 0.235743163 | 0.002517131 | 6.154202435 | 6.389945598 |
| <i>CYP4F3</i>   | 0.235156006 | 0.000941677 | 8.726433772 | 8.961589778 |
| <i>NPEPL1</i>   | 0.235039097 | 6.25262E-08 | 8.574683184 | 8.809722281 |
| <i>MCTP1</i>    | 0.234788225 | 2.62847E-06 | 7.114653748 | 7.349441974 |
| <i>CD163</i>    | 0.23440594  | 0.001015666 | 8.08032622  | 8.31473216  |
| <i>IFI16</i>    | 0.234396987 | 3.36353E-06 | 10.45201982 | 10.68641681 |
| <i>CSTA</i>     | 0.233838609 | 0.001300282 | 7.933710444 | 8.167549053 |
| <i>APOBEC3B</i> | 0.233762506 | 0.021462764 | 6.120736314 | 6.35449882  |
| <i>CHPT1</i>    | 0.23326581  | 0.009418094 | 9.280687899 | 9.513953709 |
| <i>RAB43</i>    | 0.233190713 | 2.83191E-12 | 6.982598016 | 7.215788729 |
| <i>PNPLA2</i>   | 0.232803163 | 0.000601121 | 8.552762616 | 8.785565779 |
| <i>ITGB3</i>    | 0.231909808 | 0.01075074  | 7.411430041 | 7.643339849 |
| <i>GLDC</i>     | 0.231848916 | 4.7588E-05  | 5.952594715 | 6.184443631 |
| <i>STOM</i>     | 0.231362393 | 5.73057E-05 | 9.390632301 | 9.621994694 |
| <i>FAM53C</i>   | 0.231281214 | 5.05803E-06 | 9.919431538 | 10.15071275 |
| <i>STAT2</i>    | 0.230875883 | 2.75861E-05 | 9.630471591 | 9.861347474 |
| <i>SFXN5</i>    | 0.230360911 | 8.10489E-11 | 6.656124652 | 6.886485563 |
| <i>PGM1</i>     | 0.230346663 | 1.16687E-10 | 9.483879618 | 9.714226282 |
| <i>TSHZ3</i>    | 0.230050865 | 5.07777E-06 | 7.361770091 | 7.591820956 |
| <i>ASGR2</i>    | 0.229837568 | 4.04563E-05 | 7.492981594 | 7.722819161 |

|                 |             |             |             |             |
|-----------------|-------------|-------------|-------------|-------------|
| <i>CD55</i>     | 0.229455362 | 7.84781E-05 | 9.719011138 | 9.9484665   |
| <i>MBD6</i>     | 0.229286359 | 1.09681E-05 | 9.323803758 | 9.553090117 |
| <i>PTGS1</i>    | 0.229272596 | 0.001130657 | 8.374188071 | 8.603460666 |
| <i>ZAK</i>      | 0.227816997 | 6.66784E-06 | 6.883605545 | 7.111422542 |
| <i>NMI</i>      | 0.227779416 | 7.83247E-06 | 9.276767606 | 9.504547022 |
| <i>IFITM1</i>   | 0.227513922 | 0.000602682 | 12.04281738 | 12.2703313  |
| <i>ECHDC3</i>   | 0.227412456 | 0.001476766 | 7.134415732 | 7.361828188 |
| <i>ZMYND15</i>  | 0.22721012  | 2.11592E-06 | 6.264973165 | 6.492183286 |
| <i>TAP2</i>     | 0.227131478 | 8.71906E-08 | 8.021784008 | 8.248915486 |
| <i>TGM3</i>     | 0.226997781 | 0.003797595 | 7.124958851 | 7.351956632 |
| <i>CDKN2D</i>   | 0.226882351 | 9.70568E-06 | 8.669324792 | 8.896207143 |
| <i>SIRPA</i>    | 0.226730499 | 2.70593E-05 | 10.46699385 | 10.69372435 |
| <i>C10orf11</i> | 0.226575715 | 2.87887E-06 | 6.779267106 | 7.005842822 |
| <i>IGF2BP2</i>  | 0.226547643 | 0.022783717 | 9.005534135 | 9.232081778 |
| <i>SELP</i>     | 0.226509204 | 0.000758748 | 6.857295347 | 7.083804551 |
| <i>FGD4</i>     | 0.226454424 | 1.01918E-08 | 6.425671185 | 6.652125609 |
| <i>MIIP</i>     | 0.226415766 | 1.07791E-12 | 7.06685989  | 7.293275656 |
| <i>TMEM86B</i>  | 0.226317311 | 0.003810261 | 7.85041515  | 8.076732461 |
| <i>IL1RN</i>    | 0.225955258 | 0.000592211 | 7.963900529 | 8.189855787 |
| <i>CKLF</i>     | 0.2258991   | 0.000242642 | 10.06542423 | 10.29132333 |
| <i>CEBPA</i>    | 0.225684367 | 1.98663E-06 | 8.707206367 | 8.932890735 |
| <i>POR</i>      | 0.22530413  | 9.2031E-08  | 7.674738357 | 7.900042487 |
| <i>UBTD1</i>    | 0.224909401 | 2.07855E-08 | 7.169172809 | 7.39408221  |
| <i>RBP7</i>     | 0.224853854 | 9.48989E-05 | 8.129456354 | 8.354310208 |
| <i>AGTRAP</i>   | 0.224716207 | 4.76758E-07 | 8.745815298 | 8.970531505 |
| <i>DGCR2</i>    | 0.223876465 | 2.27837E-11 | 8.360729649 | 8.584606113 |
| <i>HK2</i>      | 0.223867526 | 3.70653E-08 | 7.803386854 | 8.02725438  |
| <i>NLRX1</i>    | 0.223642996 | 1.53306E-10 | 7.471836201 | 7.695479198 |
| <i>PDLIM7</i>   | 0.2235848   | 1.27336E-05 | 7.582740938 | 7.806325738 |
| <i>PYCARD</i>   | 0.223430469 | 2.72716E-06 | 10.13620755 | 10.35963802 |
| <i>BTNL8</i>    | 0.223424557 | 0.028821051 | 6.91293855  | 7.136363107 |
| <i>PRAMI</i>    | 0.222959889 | 4.78291E-07 | 8.719995457 | 8.942955346 |
| <i>NAMPT</i>    | 0.222868235 | 0.009062397 | 11.24971146 | 11.4725797  |
| <i>ARL11</i>    | 0.222616409 | 5.27271E-11 | 6.421099929 | 6.643716338 |
| <i>EMR2</i>     | 0.222609876 | 0.002517131 | 9.357994923 | 9.580604798 |
| <i>STAT5A</i>   | 0.222532619 | 2.85086E-09 | 9.534992251 | 9.75752487  |
| <i>FYB</i>      | 0.222495845 | 1.08471E-07 | 9.969893629 | 10.19238947 |
| <i>LMTK2</i>    | 0.222317465 | 3.37212E-11 | 6.839100035 | 7.0614175   |
| <i>LAP3</i>     | 0.222287508 | 0.00471039  | 9.371755938 | 9.594043446 |
| <i>IFNAR1</i>   | 0.22157528  | 1.04847E-06 | 8.958712438 | 9.180287718 |
| <i>SLC19A1</i>  | 0.22082046  | 6.56703E-08 | 7.288917188 | 7.509737648 |
| <i>B4GALT5</i>  | 0.220492376 | 0.000976513 | 10.42835563 | 10.64884801 |
| <i>RARA</i>     | 0.220249707 | 6.53835E-09 | 7.79044076  | 8.010690467 |
| <i>TACC3</i>    | 0.220157495 | 3.41803E-09 | 8.912670611 | 9.132828107 |
| <i>GPR160</i>   | 0.220149682 | 0.001767218 | 7.539515636 | 7.759665318 |
| <i>MSL1</i>     | 0.220012304 | 2.32537E-06 | 8.394850472 | 8.614862776 |
| <i>C9orf72</i>  | 0.219815956 | 4.41605E-06 | 7.293757105 | 7.513573061 |
| <i>PRRG4</i>    | 0.219553597 | 0.000579664 | 7.416421627 | 7.635975224 |
| <i>CTRL</i>     | 0.219512393 | 1.02908E-08 | 7.00033093  | 7.219843323 |
| <i>CDA</i>      | 0.21946865  | 0.003721346 | 9.218324119 | 9.437792769 |
| <i>SLC7A5</i>   | 0.219282427 | 0.011562903 | 8.30512201  | 8.524404437 |
| <i>TIFA</i>     | 0.219042927 | 1.84532E-06 | 6.734918692 | 6.953961619 |
| <i>CASP1</i>    | 0.218752092 | 2.58855E-06 | 9.890336459 | 10.10908855 |
| <i>YOD1</i>     | 0.218716212 | 0.014585472 | 7.675039664 | 7.893755876 |
| <i>PRMT5</i>    | 0.218676644 | 2.67003E-11 | 7.967532457 | 8.186209101 |
| <i>MOSPD2</i>   | 0.218594227 | 1.05967E-05 | 8.300111377 | 8.518705604 |
| <i>CTNNAL1</i>  | 0.218547484 | 0.005727667 | 6.818207887 | 7.036755371 |
| <i>NRN1</i>     | 0.21839308  | 2.66154E-05 | 5.685115831 | 5.903508912 |
| <i>VSTM1</i>    | 0.218305135 | 0.001007479 | 7.465160907 | 7.683466042 |

|                  |             |             |             |             |
|------------------|-------------|-------------|-------------|-------------|
| <i>CREG1</i>     | 0.217945407 | 0.003736156 | 9.6919917   | 9.909937107 |
| <i>ANKRD9</i>    | 0.217938498 | 0.007776263 | 7.191788314 | 7.409726812 |
| <i>CASP4</i>     | 0.217892445 | 7.96491E-08 | 9.370429461 | 9.588321906 |
| <i>EDEM2</i>     | 0.217812517 | 1.0492E-13  | 8.711712303 | 8.92952482  |
| <i>RENBP</i>     | 0.217547704 | 6.412E-08   | 7.585107045 | 7.802654748 |
| <i>KEL</i>       | 0.216790048 | 0.005626521 | 6.57230625  | 6.789096298 |
| <i>RBM47</i>     | 0.216771423 | 0.000221541 | 9.53529434  | 9.752065763 |
| <i>CLEC1A</i>    | 0.216719504 | 2.8057E-07  | 5.997889632 | 6.214609136 |
| <i>S100A9</i>    | 0.216655922 | 0.000428399 | 12.94035263 | 13.15700855 |
| <i>FGF13</i>     | 0.216475875 | 0.000166382 | 5.689300002 | 5.905775876 |
| <i>TBC1D8</i>    | 0.216271548 | 3.58512E-05 | 7.418300941 | 7.634572489 |
| <i>IQSEC1</i>    | 0.216051786 | 6.36222E-09 | 9.497290639 | 9.713342425 |
| <i>FERMT3</i>    | 0.215700632 | 4.36235E-09 | 9.750712184 | 9.966412817 |
| <i>PABPC1L</i>   | 0.215521502 | 2.95179E-06 | 7.381833612 | 7.597355114 |
| <i>PHGDH</i>     | 0.215515746 | 2.86183E-06 | 7.316465352 | 7.531981099 |
| <i>NFIX</i>      | 0.215327007 | 0.008874065 | 7.024515737 | 7.239842744 |
| <i>TRIM21</i>    | 0.21479357  | 8.15498E-07 | 8.941502694 | 9.156296264 |
| <i>HLX</i>       | 0.214112928 | 7.68158E-05 | 8.228394678 | 8.442507606 |
| <i>PHKA2</i>     | 0.214033343 | 4.14702E-08 | 8.077947829 | 8.291981172 |
| <i>CTSZ</i>      | 0.214018383 | 1.27928E-05 | 9.130035652 | 9.344054035 |
| <i>SULT1B1</i>   | 0.213839957 | 0.00080621  | 7.640038004 | 7.853877961 |
| <i>MEF2A</i>     | 0.2136289   | 2.17251E-12 | 7.044899004 | 7.258527904 |
| <i>SH2B2</i>     | 0.213318558 | 1.42284E-09 | 6.956366811 | 7.169685369 |
| <i>PDK3</i>      | 0.212848667 | 2.29475E-08 | 8.104521921 | 8.317370588 |
| <i>PPP1R3D</i>   | 0.212746084 | 5.58187E-08 | 7.973823745 | 8.186569829 |
| <i>SAMSN1</i>    | 0.212716124 | 0.000489088 | 7.621722544 | 7.834438668 |
| <i>CTSD</i>      | 0.212680504 | 0.000134962 | 9.076461032 | 9.289141537 |
| <i>PPP1R14B</i>  | 0.212579746 | 2.29475E-08 | 8.531136318 | 8.743716063 |
| <i>NFKBIZ</i>    | 0.212254159 | 2.32853E-05 | 9.124201147 | 9.336455306 |
| <i>LRRK2</i>     | 0.212248642 | 0.00061907  | 9.11529182  | 9.327540462 |
| <i>RAB20</i>     | 0.212220869 | 5.56766E-07 | 6.55333789  | 6.765558759 |
| <i>GRK6</i>      | 0.21218701  | 3.29152E-11 | 8.259551202 | 8.471738212 |
| <i>CEBPE</i>     | 0.212052537 | 2.70593E-05 | 6.660033682 | 6.872086219 |
| <i>OSBPL1A</i>   | 0.211822433 | 2.76414E-07 | 6.705589632 | 6.917412065 |
| <i>CECR6</i>     | 0.211817866 | 0.000164347 | 7.472230252 | 7.684048118 |
| <i>OASL</i>      | 0.211744819 | 0.007495727 | 7.951425733 | 8.163170552 |
| <i>TK1</i>       | 0.211613542 | 1.68402E-07 | 6.403318875 | 6.614932418 |
| <i>HIST1H2BG</i> | 0.211360486 | 0.001116011 | 6.701546352 | 6.912906839 |
| <i>GNB2</i>      | 0.21120182  | 8.67945E-07 | 8.366968    | 8.57816982  |
| <i>ACSL4</i>     | 0.210966056 | 2.49418E-06 | 7.591789916 | 7.802755973 |
| <i>IRF9</i>      | 0.210780407 | 2.3878E-07  | 10.16856378 | 10.37934419 |
| <i>SLC22A16</i>  | 0.210691587 | 6.83508E-05 | 6.027534107 | 6.238225694 |
| <i>PFKFB2</i>    | 0.210653111 | 1.71412E-05 | 6.222337044 | 6.432990155 |
| <i>ITGAX</i>     | 0.210476282 | 0.000219154 | 8.69682011  | 8.907296392 |
| <i>BAK1</i>      | 0.210227245 | 8.23688E-10 | 7.479251616 | 7.689478861 |
| <i>GNS</i>       | 0.210098635 | 6.0274E-05  | 10.83291808 | 11.04301671 |
| <i>CDCA5</i>     | 0.209798605 | 9.69097E-06 | 6.323701065 | 6.533499671 |
| <i>ODF3B</i>     | 0.20973088  | 9.53729E-09 | 6.762372438 | 6.972103318 |
| <i>PGM2</i>      | 0.209693555 | 3.30573E-07 | 8.004896979 | 8.214590535 |
| <i>ITPRIP</i>    | 0.209425592 | 2.91968E-06 | 9.43019469  | 9.639620282 |
| <i>RNF135</i>    | 0.209282414 | 1.06544E-10 | 7.841955525 | 8.051237939 |
| <i>CAPN1</i>     | 0.208921468 | 1.91972E-08 | 9.166427531 | 9.375348999 |
| <i>ASAP1</i>     | 0.208875464 | 3.12186E-05 | 9.840010889 | 10.04888635 |
| <i>CARD6</i>     | 0.208810686 | 4.51965E-06 | 7.230250324 | 7.439061009 |
| <i>CYP4F12</i>   | 0.208790338 | 9.52398E-07 | 5.893335379 | 6.102125717 |
| <i>UBE2L6</i>    | 0.208558961 | 0.000104184 | 10.26813596 | 10.47669492 |
| <i>OLAH</i>      | 0.208391096 | 0.003783536 | 5.331893853 | 5.540284949 |
| <i>PNPLA6</i>    | 0.208302263 | 1.51752E-07 | 8.783386023 | 8.991688285 |
| <i>ACTA2</i>     | 0.208207711 | 0.000528749 | 7.378450075 | 7.586657785 |

|                 |             |             |             |             |
|-----------------|-------------|-------------|-------------|-------------|
| <i>TPD52L2</i>  | 0.208119821 | 1.76853E-08 | 9.787112241 | 9.995232062 |
| <i>MTMR3</i>    | 0.207613366 | 2.8644E-06  | 8.519955077 | 8.727568443 |
| <i>GNAI5</i>    | 0.207483711 | 6.80875E-06 | 8.31946452  | 8.526948231 |
| <i>ETV6</i>     | 0.207214962 | 7.79553E-11 | 8.834188173 | 9.041403135 |
| <i>ARHGAP27</i> | 0.20719103  | 1.60677E-08 | 7.38336774  | 7.59055877  |
| <i>CDKN1A</i>   | 0.2071869   | 0.000327644 | 8.511614066 | 8.718800966 |
| <i>AFF1</i>     | 0.207148159 | 1.7183E-06  | 7.899643008 | 8.106791167 |
| <i>STK3</i>     | 0.207007746 | 4.31529E-06 | 7.018318279 | 7.225326025 |
| <i>ANKRD55</i>  | 0.206895439 | 0.000669992 | 7.06847083  | 7.275366269 |
| <i>PTPRE</i>    | 0.206568425 | 1.33676E-07 | 8.816576102 | 9.023144526 |
| <i>DOK4</i>     | 0.20645963  | 2.27923E-09 | 6.169923737 | 6.376383367 |
| <i>CLEC12B</i>  | 0.206065685 | 0.000199805 | 5.80228349  | 6.008349175 |
| <i>CIQC</i>     | 0.205899619 | 0.001149215 | 5.854644979 | 6.060544598 |
| <i>ETS2</i>     | 0.205718491 | 0.000334123 | 8.480546147 | 8.686264638 |
| <i>APOL1</i>    | 0.205600395 | 5.85721E-07 | 6.893338533 | 7.098938928 |
| <i>PLOD1</i>    | 0.20552123  | 2.32537E-06 | 8.77390958  | 8.97943081  |
| <i>LPCAT3</i>   | 0.204566006 | 2.23823E-08 | 8.329579474 | 8.53414548  |
| <i>INSL3</i>    | 0.204267143 | 9.15391E-07 | 6.528575303 | 6.732842446 |
| <i>APOL6</i>    | 0.204243581 | 8.82198E-06 | 7.206261019 | 7.4105046   |
| <i>FAM8A1</i>   | 0.203708421 | 3.80703E-06 | 8.889756555 | 9.093464976 |
| <i>GAA</i>      | 0.203429474 | 1.88959E-06 | 7.793681525 | 7.997110998 |
| <i>PPP1R3B</i>  | 0.202807787 | 3.06378E-07 | 6.841855903 | 7.04466369  |
| <i>GAS7</i>     | 0.202690543 | 3.00239E-06 | 7.585111287 | 7.787801829 |
| <i>DIRC2</i>    | 0.202590476 | 0.000169627 | 7.983986462 | 8.186576938 |
| <i>EIF2AK1</i>  | 0.202103396 | 0.000466463 | 9.878167062 | 10.08027046 |
| <i>CYBA</i>     | 0.201999878 | 0.000184964 | 10.92714409 | 11.12914396 |
| <i>LY96</i>     | 0.201801821 | 0.035803601 | 9.359089679 | 9.5608915   |
| <i>TM6SF1</i>   | 0.201510237 | 0.001565774 | 8.447061945 | 8.648572182 |
| <i>MSL3</i>     | 0.201355408 | 3.40118E-08 | 8.119073139 | 8.320428547 |
| <i>H2AFJ</i>    | 0.201338539 | 0.000172431 | 7.765282144 | 7.966620684 |
| <i>AQP10</i>    | 0.201310743 | 0.011087692 | 6.511305214 | 6.712615957 |
| <i>CLIC1</i>    | 0.201171947 | 5.95797E-07 | 11.5986506  | 11.79982255 |
| <i>LILRB4</i>   | 0.200990968 | 2.03603E-07 | 6.438167026 | 6.639157994 |
| <i>CCNJL</i>    | 0.200806776 | 0.002677591 | 8.147766299 | 8.348573075 |
| <i>NTNG2</i>    | 0.20070778  | 2.40783E-08 | 7.30385457  | 7.50456235  |

**Supplementary Table S2.** Downregulated genes in Crohn's disease.

| Gene            | logFC        | adj.P.Val   | Mean expression in controls | Mean expression in CD patients |
|-----------------|--------------|-------------|-----------------------------|--------------------------------|
| <i>GNLY</i>     | -0.657279174 | 1.00547E-08 | 10.6946354                  | 10.03735623                    |
| <i>KLRF1</i>    | -0.64459392  | 3.226E-11   | 8.23665076                  | 7.59205684                     |
| <i>GZMK</i>     | -0.642536978 | 9.71267E-12 | 9.907031269                 | 9.264494292                    |
| <i>CD160</i>    | -0.548781676 | 1.89653E-10 | 7.758430009                 | 7.209648333                    |
| <i>KLRD1</i>    | -0.489860798 | 8.03303E-09 | 8.49240285                  | 8.002542052                    |
| <i>FGFBP2</i>   | -0.475577071 | 0.00014462  | 9.389139128                 | 8.913562057                    |
| <i>PTGDS</i>    | -0.470013207 | 1.22668E-11 | 7.711196531                 | 7.241183324                    |
| <i>PRF1</i>     | -0.46770428  | 4.95026E-08 | 10.40708561                 | 9.939381327                    |
| <i>KLRG1</i>    | -0.461901435 | 4.6463E-09  | 8.456951263                 | 7.995049828                    |
| <i>CTSW</i>     | -0.449970277 | 2.40349E-11 | 9.23189858                  | 8.781928303                    |
| <i>KLRB1</i>    | -0.438983875 | 3.11643E-08 | 10.34694654                 | 9.907962662                    |
| <i>SH2D1B</i>   | -0.435826689 | 1.40855E-09 | 7.447422982                 | 7.011596293                    |
| <i>CCL3</i>     | -0.41920503  | 3.05944E-07 | 7.310466509                 | 6.891261479                    |
| <i>GZMA</i>     | -0.412585983 | 1.58946E-05 | 10.09432594                 | 9.681739955                    |
| <i>NKG7</i>     | -0.392458938 | 1.63302E-05 | 11.58810348                 | 11.19564454                    |
| <i>IL2RB</i>    | -0.389274601 | 7.70316E-07 | 10.11638961                 | 9.727115007                    |
| <i>NELL2</i>    | -0.378952639 | 5.2503E-06  | 9.519934038                 | 9.140981399                    |
| <i>FCRLA</i>    | -0.376014601 | 2.91646E-05 | 8.32926193                  | 7.953247329                    |
| <i>TGFBR3</i>   | -0.360344717 | 5.9639E-06  | 8.70914557                  | 8.348800852                    |
| <i>P2RY10</i>   | -0.359743403 | 2.95089E-11 | 7.842649038                 | 7.482905635                    |
| <i>TSPAN13</i>  | -0.354279855 | 6.13986E-10 | 7.811237897                 | 7.456958043                    |
| <i>IL7R</i>     | -0.352579609 | 3.60523E-06 | 11.85845342                 | 11.50587381                    |
| <i>EOMES</i>    | -0.337413375 | 2.14934E-06 | 9.502013988                 | 9.164600613                    |
| <i>CD3E</i>     | -0.336240901 | 1.97952E-07 | 8.852528321                 | 8.51628742                     |
| <i>AKRIC3</i>   | -0.335525168 | 2.5844E-05  | 7.842526254                 | 7.507001086                    |
| <i>CLIC3</i>    | -0.333129288 | 9.76111E-06 | 7.959858712                 | 7.626729424                    |
| <i>GPR183</i>   | -0.32730621  | 6.56957E-14 | 8.048560943                 | 7.721254733                    |
| <i>CCR3</i>     | -0.322578508 | 0.000219201 | 7.791092488                 | 7.46851398                     |
| <i>CD69</i>     | -0.313350996 | 1.70276E-07 | 8.326335599                 | 8.012984603                    |
| <i>FAIM3</i>    | -0.31145541  | 6.2939E-06  | 10.66272421                 | 10.3512688                     |
| <i>PTGDR</i>    | -0.31075713  | 1.23198E-07 | 7.443450309                 | 7.132693179                    |
| <i>CD2</i>      | -0.309844757 | 1.28511E-06 | 10.61316112                 | 10.30331636                    |
| <i>CD96</i>     | -0.309474638 | 3.06895E-07 | 9.073561077                 | 8.764086439                    |
| <i>LAIR2</i>    | -0.307186662 | 7.09103E-05 | 7.323675285                 | 7.016488622                    |
| <i>RPL14</i>    | -0.305673019 | 5.9926E-07  | 10.21741908                 | 9.911746066                    |
| <i>MCOLN2</i>   | -0.304808004 | 1.06179E-08 | 7.821073146                 | 7.516265141                    |
| <i>KLRC3</i>    | -0.302323344 | 3.63261E-06 | 6.720063406                 | 6.417740061                    |
| <i>CA5B</i>     | -0.295635769 | 7.94223E-11 | 7.59338578                  | 7.297750011                    |
| <i>HLA-DOB</i>  | -0.292549788 | 2.51474E-06 | 7.56509302                  | 7.272543232                    |
| <i>ID3</i>      | -0.289531625 | 2.28538E-06 | 7.844590767                 | 7.555059142                    |
| <i>CHI3L1</i>   | -0.28936919  | 0.00037875  | 7.868792769                 | 7.579423579                    |
| <i>PYHIN1</i>   | -0.287342699 | 2.28584E-06 | 8.300990681                 | 8.013647982                    |
| <i>HLA-DQA1</i> | -0.284433947 | 0.006723794 | 9.724728109                 | 9.440294161                    |
| <i>CDKN1C</i>   | -0.283496353 | 3.47484E-06 | 7.572380021                 | 7.288883669                    |
| <i>S1PR5</i>    | -0.283095266 | 0.00020357  | 8.168966859                 | 7.885871593                    |
| <i>RPS28</i>    | -0.282592971 | 4.36201E-05 | 11.33465859                 | 11.05206562                    |
| <i>IL32</i>     | -0.280597566 | 3.64049E-05 | 9.891016147                 | 9.610418581                    |
| <i>MPZL1</i>    | -0.280085012 | 3.51919E-07 | 7.558497218                 | 7.278412206                    |
| <i>AUTS2</i>    | -0.278873281 | 7.23427E-09 | 7.561458138                 | 7.282584858                    |
| <i>MYOM2</i>    | -0.278502764 | 0.009702629 | 7.345983597                 | 7.067480833                    |
| <i>TARP</i>     | -0.277695039 | 0.000140081 | 8.312093786                 | 8.034398747                    |
| <i>RASGRP1</i>  | -0.274223686 | 1.26012E-06 | 9.770539584                 | 9.496315897                    |
| <i>CD247</i>    | -0.274219514 | 1.79419E-05 | 10.98325178                 | 10.70903227                    |
| <i>IFFO2</i>    | -0.273300968 | 4.76451E-10 | 7.052705213                 | 6.779404244                    |
| <i>GPR56</i>    | -0.272878052 | 0.005221486 | 8.779698334                 | 8.506820282                    |
| <i>GRAMD1C</i>  | -0.271826612 | 3.31113E-05 | 6.439380764                 | 6.167554153                    |

|                 |              |             |             |             |
|-----------------|--------------|-------------|-------------|-------------|
| <i>SKAP1</i>    | -0.271388695 | 8.16657E-07 | 9.091830243 | 8.820441548 |
| <i>PRSS23</i>   | -0.270463772 | 1.5493E-06  | 6.51898955  | 6.248525777 |
| <i>RPL21</i>    | -0.269743103 | 0.000105421 | 11.60423728 | 11.33449418 |
| <i>ETS1</i>     | -0.267957633 | 2.57927E-05 | 10.96969108 | 10.70173345 |
| <i>FCRL3</i>    | -0.267755617 | 1.20138E-05 | 8.023676735 | 7.755921118 |
| <i>CHST7</i>    | -0.266684312 | 8.7045E-08  | 8.538227044 | 8.271542732 |
| <i>PLEKHA1</i>  | -0.266576223 | 6.23606E-07 | 8.74045332  | 8.473877096 |
| <i>VPREB3</i>   | -0.264815993 | 0.00424279  | 7.582224263 | 7.31740827  |
| <i>NCR3</i>     | -0.264692668 | 3.56274E-07 | 7.50649351  | 7.241800841 |
| <i>MYBL1</i>    | -0.264131306 | 6.16244E-06 | 7.656253717 | 7.392122411 |
| <i>SLAMF6</i>   | -0.263891638 | 4.47688E-07 | 9.328958041 | 9.065066403 |
| <i>GATA3</i>    | -0.262168265 | 5.07723E-09 | 7.630519094 | 7.368350829 |
| <i>SPRYD3</i>   | -0.26178624  | 0.000126778 | 9.736621085 | 9.474834845 |
| <i>RPS23</i>    | -0.261594503 | 0.001860427 | 9.937019623 | 9.675425121 |
| <i>HOPX</i>     | -0.258424775 | 3.82474E-07 | 7.072362809 | 6.813938034 |
| <i>SPOCK2</i>   | -0.257550305 | 0.000135757 | 10.79681    | 10.53925969 |
| <i>RPL9</i>     | -0.257284783 | 7.15357E-05 | 11.6460882  | 11.38880342 |
| <i>SAMD3</i>    | -0.256132087 | 1.71079E-05 | 8.175052023 | 7.918919935 |
| <i>CD8A</i>     | -0.255752255 | 0.001056067 | 10.15692012 | 9.901167868 |
| <i>RNF125</i>   | -0.254819066 | 2.04375E-11 | 7.946358499 | 7.691539433 |
| <i>SH2D1A</i>   | -0.254192033 | 3.26001E-05 | 8.852347232 | 8.598155199 |
| <i>ZNF831</i>   | -0.253150067 | 3.56274E-07 | 7.326550524 | 7.073400457 |
| <i>SIPR1</i>    | -0.252182481 | 5.9202E-06  | 9.086815035 | 8.834632555 |
| <i>CCL4</i>     | -0.251761558 | 1.01307E-05 | 6.899969901 | 6.648208342 |
| <i>RFTN1</i>    | -0.251596595 | 3.76704E-08 | 9.038212533 | 8.786615938 |
| <i>ID2</i>      | -0.249737723 | 5.73434E-07 | 9.611190037 | 9.361452315 |
| <i>FCERIA</i>   | -0.24939418  | 0.0114218   | 8.418384059 | 8.168989878 |
| <i>SYTL2</i>    | -0.24837492  | 2.04201E-06 | 7.07508954  | 6.82671462  |
| <i>EBF1</i>     | -0.247194399 | 7.70932E-06 | 6.888290207 | 6.641095808 |
| <i>HSP90AB1</i> | -0.246148737 | 9.5242E-07  | 10.13324655 | 9.887097817 |
| <i>SSBP1</i>    | -0.245870926 | 1.06002E-07 | 9.136476773 | 8.890605847 |
| <i>GLOD4</i>    | -0.243261937 | 5.09776E-08 | 8.962165235 | 8.718903298 |
| <i>BTLA</i>     | -0.242725474 | 5.60169E-06 | 7.814567435 | 7.571841961 |
| <i>STAT4</i>    | -0.242100793 | 4.37027E-05 | 9.774462903 | 9.53236211  |
| <i>PTMA</i>     | -0.241299424 | 0.000637187 | 10.37547467 | 10.13417525 |
| <i>NOP58</i>    | -0.241243535 | 5.37757E-08 | 9.371342682 | 9.130099146 |
| <i>PASK</i>     | -0.240246119 | 2.62848E-06 | 8.127621745 | 7.887375626 |
| <i>CD3G</i>     | -0.240222127 | 0.000111935 | 8.993425592 | 8.753203465 |
| <i>CCND2</i>    | -0.239309613 | 3.37103E-05 | 9.735251061 | 9.495941448 |
| <i>ZNF792</i>   | -0.238487861 | 1.36007E-08 | 7.236228655 | 6.997740793 |
| <i>FCER2</i>    | -0.238195945 | 0.000503267 | 7.086597376 | 6.848401432 |
| <i>NMT2</i>     | -0.236683937 | 5.00314E-06 | 7.585102519 | 7.348418582 |
| <i>HLA-DPA1</i> | -0.236585871 | 0.001789381 | 11.80595714 | 11.56937127 |
| <i>LSM5</i>     | -0.235582873 | 2.4861E-05  | 7.696933159 | 7.461350287 |
| <i>ZMYM6</i>    | -0.235534758 | 3.26942E-11 | 7.896991879 | 7.661457121 |
| <i>PTGS2</i>    | -0.234039394 | 0.019895137 | 8.603039734 | 8.36900034  |
| <i>CLEC2D</i>   | -0.233534318 | 1.22859E-05 | 9.571725997 | 9.338191679 |
| <i>LDHB</i>     | -0.231917301 | 0.000435934 | 11.25530692 | 11.02338962 |
| <i>NUCKS1</i>   | -0.231125183 | 2.03272E-07 | 9.211769656 | 8.980644474 |
| <i>PVRIG</i>    | -0.230446995 | 0.000201823 | 9.088189129 | 8.857742134 |
| <i>LDOC1</i>    | -0.230420529 | 2.85877E-08 | 6.897820862 | 6.667400333 |
| <i>CD79A</i>    | -0.228759389 | 0.003795061 | 8.872921192 | 8.644161803 |
| <i>S100A10</i>  | -0.228077695 | 2.39221E-06 | 11.69800773 | 11.46993003 |
| <i>RPS27</i>    | -0.226609263 | 4.53822E-05 | 12.1853479  | 11.95873864 |
| <i>MTSS1</i>    | -0.226467728 | 2.75964E-09 | 8.10336469  | 7.876896962 |
| <i>EIF3A</i>    | -0.225560818 | 1.39289E-08 | 9.483552272 | 9.257991453 |
| <i>CD3D</i>     | -0.225213976 | 0.000751585 | 10.3897971  | 10.16458312 |
| <i>TYW1</i>     | -0.224970817 | 0.000282568 | 8.058346642 | 7.833375825 |
| <i>GPR18</i>    | -0.224765164 | 0.000123827 | 8.442650311 | 8.217885146 |

|                 |              |             |             |             |
|-----------------|--------------|-------------|-------------|-------------|
| <i>HSPH1</i>    | -0.222742959 | 1.9353E-05  | 8.856136075 | 8.633393116 |
| <i>API5</i>     | -0.221629073 | 1.65261E-07 | 8.279637222 | 8.058008149 |
| <i>CRYZ</i>     | -0.22141474  | 0.000192092 | 8.125989645 | 7.904574905 |
| <i>CCR7</i>     | -0.221316693 | 0.020330503 | 10.86227183 | 10.64095514 |
| <i>BCL11A</i>   | -0.221175434 | 5.75532E-07 | 8.101942862 | 7.880767429 |
| <i>USP11</i>    | -0.220974421 | 1.08603E-08 | 8.218739207 | 7.997764786 |
| <i>NCALD</i>    | -0.220479504 | 3.57465E-06 | 7.091908785 | 6.871429282 |
| <i>RPS4X</i>    | -0.220126376 | 2.75747E-07 | 12.74326541 | 12.52313904 |
| <i>TSPYL1</i>   | -0.219801937 | 2.66728E-13 | 8.383135127 | 8.16333319  |
| <i>G3BP1</i>    | -0.21937783  | 4.38983E-07 | 8.008578754 | 7.789200924 |
| <i>ADRB2</i>    | -0.219366009 | 8.76573E-07 | 8.903860282 | 8.684494273 |
| <i>NR3C2</i>    | -0.218991869 | 2.0893E-07  | 7.262218132 | 7.043226263 |
| <i>COX7B</i>    | -0.218434445 | 0.001243878 | 8.245802304 | 8.027367859 |
| <i>MEX3C</i>    | -0.218031655 | 1.29561E-10 | 7.458556108 | 7.240524453 |
| <i>CD40LG</i>   | -0.217994607 | 9.606E-05   | 7.126630124 | 6.908635517 |
| <i>ITK</i>      | -0.217411123 | 0.000697552 | 10.54877306 | 10.33136194 |
| <i>C8orf59</i>  | -0.21612944  | 0.000398346 | 8.338626791 | 8.122497351 |
| <i>PPIH</i>     | -0.215929443 | 4.61398E-07 | 8.676831717 | 8.460902274 |
| <i>CD4</i>      | -0.215843533 | 3.01079E-05 | 7.835288147 | 7.619444614 |
| <i>OSBPL10</i>  | -0.215512307 | 1.00106E-05 | 6.789362493 | 6.573850186 |
| <i>KIAA0355</i> | -0.215192337 | 1.09528E-08 | 8.604726028 | 8.38953369  |
| <i>PRKCH</i>    | -0.214799149 | 0.000747434 | 9.903894614 | 9.689095465 |
| <i>PCID2</i>    | -0.214776333 | 1.17997E-08 | 9.408071255 | 9.193294922 |
| <i>INPP4B</i>   | -0.214552709 | 9.23357E-06 | 7.323063626 | 7.108510917 |
| <i>PPP3CC</i>   | -0.214393751 | 1.57406E-06 | 8.29599511  | 8.081601359 |
| <i>C12orf57</i> | -0.21386543  | 0.004662457 | 9.700642418 | 9.486776988 |
| <i>WBP11</i>    | -0.213479916 | 2.04175E-10 | 8.434535062 | 8.221055146 |
| <i>SLAIN1</i>   | -0.213185035 | 5.14355E-07 | 7.253932193 | 7.040747158 |
| <i>KIAA1147</i> | -0.213048784 | 1.57406E-06 | 8.39028428  | 8.177235496 |
| <i>SNRPA1</i>   | -0.213025283 | 2.18858E-08 | 9.19162678  | 8.978601498 |
| <i>KLRC1</i>    | -0.212816324 | 0.002059982 | 7.143963158 | 6.931146834 |
| <i>TMEM14A</i>  | -0.212142194 | 3.52811E-08 | 7.185906008 | 6.973763814 |
| <i>CXCR3</i>    | -0.212017203 | 0.000139578 | 7.719301387 | 7.507284184 |
| <i>ITM2A</i>    | -0.211469877 | 0.000215426 | 9.244677305 | 9.033207428 |
| <i>KLF12</i>    | -0.211034095 | 3.9719E-06  | 7.521106548 | 7.310072453 |
| <i>EIF3H</i>    | -0.210978587 | 1.3756E-07  | 10.15775928 | 9.946780693 |
| <i>BCL11B</i>   | -0.210533981 | 0.001135313 | 8.975532589 | 8.764998608 |
| <i>RPL5</i>     | -0.210245451 | 2.69256E-05 | 10.99686955 | 10.7866241  |
| <i>WDR82</i>    | -0.20934322  | 6.16244E-06 | 10.73166458 | 10.52232136 |
| <i>CCDC65</i>   | -0.20924731  | 2.88298E-07 | 6.357679344 | 6.148432034 |
| <i>DENND2D</i>  | -0.209078144 | 4.40708E-05 | 9.979207374 | 9.770129229 |
| <i>FASLG</i>    | -0.208369374 | 0.000129953 | 6.798115478 | 6.589746104 |
| <i>SLC38A1</i>  | -0.207882549 | 0.000108394 | 9.116631502 | 8.908748953 |
| <i>MYC</i>      | -0.20775011  | 0.00260295  | 9.198143207 | 8.990393097 |
| <i>CCDC58</i>   | -0.207628469 | 3.09573E-06 | 7.107056485 | 6.899428016 |
| <i>DDIT4</i>    | -0.206899316 | 0.000509708 | 9.453006174 | 9.246106858 |
| <i>WDR54</i>    | -0.206656945 | 1.26914E-05 | 8.533916935 | 8.32725999  |
| <i>CBLB</i>     | -0.206547234 | 1.00765E-05 | 8.328849408 | 8.122302173 |
| <i>KIR2DL1</i>  | -0.206505576 | 0.00234986  | 6.834243328 | 6.627737753 |
| <i>RPS20</i>    | -0.206362064 | 2.45911E-07 | 12.33799604 | 12.13163398 |
| <i>FYN</i>      | -0.205718706 | 1.97933E-08 | 9.631033063 | 9.425314357 |
| <i>DDX24</i>    | -0.205615369 | 2.15786E-06 | 9.59907053  | 9.393455161 |
| <i>FRG1</i>     | -0.205613791 | 3.78426E-05 | 8.724795137 | 8.519181346 |
| <i>CLNS1A</i>   | -0.20475331  | 2.16836E-05 | 9.391337483 | 9.186584173 |
| <i>EIF1AX</i>   | -0.204638135 | 1.27233E-05 | 7.949247445 | 7.74460931  |
| <i>RFX7</i>     | -0.204536619 | 5.1593E-07  | 8.387189511 | 8.182652891 |
| <i>OCIAD2</i>   | -0.20367565  | 0.000534644 | 8.813948295 | 8.610272645 |
| <i>TTC27</i>    | -0.20287305  | 8.24237E-07 | 7.559846964 | 7.356973913 |
| <i>RRN3</i>     | -0.202667538 | 3.68897E-07 | 8.299957865 | 8.097290327 |

|                |              |             |             |             |
|----------------|--------------|-------------|-------------|-------------|
| <i>INTS2</i>   | -0.202474429 | 1.56028E-07 | 7.63270382  | 7.430229391 |
| <i>ABHD14A</i> | -0.201549183 | 3.60934E-06 | 7.597167663 | 7.39561848  |
| <i>CLECL1</i>  | -0.20145319  | 7.17514E-05 | 6.369585469 | 6.168132279 |
| <i>SH3YL1</i>  | -0.201157974 | 8.0914E-06  | 7.139785556 | 6.938627582 |
| <i>ZNF329</i>  | -0.200694595 | 1.97952E-07 | 7.307791008 | 7.107096413 |
| <i>PTS</i>     | -0.200658404 | 1.14013E-08 | 7.303407842 | 7.102749438 |
| <i>HDDC2</i>   | -0.200405279 | 0.000107567 | 8.850620047 | 8.650214769 |
| <i>RPL15</i>   | -0.200313137 | 0.00032548  | 11.30178073 | 11.10146759 |
| <i>TRMT112</i> | -0.200162931 | 3.38004E-05 | 10.5678652  | 10.36770227 |

**Supplementary Table S3.** Upregulated genes in ulcerative colitis.

| Gene            | logFC       | adj.P.Val   | Mean expression in controls | Mean expression in UC patients |
|-----------------|-------------|-------------|-----------------------------|--------------------------------|
| <i>CD177</i>    | 0.876873436 | 1.44575E-08 | 6.07250708                  | 6.949380515                    |
| <i>MMP9</i>     | 0.789963649 | 1.68575E-07 | 10.02939013                 | 10.81935378                    |
| <i>HP</i>       | 0.772634969 | 1.65415E-09 | 6.785310025                 | 7.557944994                    |
| <i>ALPL</i>     | 0.769651828 | 1.03719E-09 | 9.958293905                 | 10.72794573                    |
| <i>ANXA3</i>    | 0.760540818 | 3.61112E-09 | 8.125749632                 | 8.886290451                    |
| <i>SLC26A8</i>  | 0.685183954 | 3.55676E-15 | 6.568113749                 | 7.253297704                    |
| <i>TLR5</i>     | 0.627027966 | 1.69249E-11 | 8.263478218                 | 8.890506184                    |
| <i>DYSF</i>     | 0.623399204 | 1.34264E-10 | 10.18725725                 | 10.81065645                    |
| <i>SI00A12</i>  | 0.620630753 | 0.000127779 | 9.975468796                 | 10.59609955                    |
| <i>IGJ</i>      | 0.599672304 | 5.53054E-05 | 9.106085538                 | 9.705757842                    |
| <i>F5</i>       | 0.596053766 | 5.09888E-10 | 8.193440198                 | 8.789493964                    |
| <i>FCGRIA</i>   | 0.580933093 | 3.17277E-07 | 8.131961117                 | 8.71289421                     |
| <i>PGLYRP1</i>  | 0.579669792 | 1.24496E-07 | 8.590944298                 | 9.17061409                     |
| <i>CA4</i>      | 0.568802649 | 1.42565E-08 | 7.982965327                 | 8.551767976                    |
| <i>TNFRSF17</i> | 0.556537907 | 2.18903E-07 | 6.564834528                 | 7.121372435                    |
| <i>HK3</i>      | 0.555765166 | 1.62366E-11 | 8.657058716                 | 9.212823882                    |
| <i>GYG1</i>     | 0.536490886 | 6.11628E-09 | 9.871870517                 | 10.4083614                     |
| <i>PFKFB3</i>   | 0.530196986 | 5.54491E-09 | 9.582449998                 | 10.11264698                    |
| <i>GPR97</i>    | 0.528916663 | 1.69249E-11 | 7.902093043                 | 8.431009707                    |
| <i>ANKRD22</i>  | 0.526956397 | 1.14577E-05 | 6.840863036                 | 7.367819433                    |
| <i>OLFM4</i>    | 0.516157983 | 0.000808969 | 6.369860154                 | 6.886018138                    |
| <i>IL4R</i>     | 0.505359189 | 1.95732E-15 | 9.157573814                 | 9.662933003                    |
| <i>ARG1</i>     | 0.49620529  | 0.000107605 | 6.467726472                 | 6.963931763                    |
| <i>ADM</i>      | 0.487341462 | 4.95035E-07 | 9.951953946                 | 10.43929541                    |
| <i>CST7</i>     | 0.482915268 | 1.46094E-07 | 10.46708295                 | 10.94999822                    |
| <i>IL18RAP</i>  | 0.473636837 | 1.31528E-05 | 10.24726668                 | 10.72090352                    |
| <i>MMP8</i>     | 0.472457915 | 0.000204002 | 5.477095233                 | 5.949553148                    |
| <i>FCGRIIB</i>  | 0.465278686 | 4.6122E-06  | 7.888073577                 | 8.353352263                    |
| <i>LTF</i>      | 0.464132298 | 0.000679757 | 7.321396557                 | 7.785528855                    |
| <i>GALNT14</i>  | 0.457227886 | 3.83077E-12 | 6.288717116                 | 6.745945002                    |
| <i>SLC37A3</i>  | 0.456243701 | 1.91794E-11 | 7.566352627                 | 8.022596328                    |
| <i>KCNJ15</i>   | 0.454689946 | 9.55032E-10 | 7.972306456                 | 8.426996402                    |
| <i>GPR84</i>    | 0.454623153 | 3.63142E-05 | 6.472789294                 | 6.927412446                    |
| <i>MCTP2</i>    | 0.454308688 | 3.51708E-11 | 7.784348385                 | 8.238657073                    |
| <i>NQO2</i>     | 0.448822325 | 5.88705E-07 | 8.444110522                 | 8.892932848                    |
| <i>PYGL</i>     | 0.448099824 | 9.72379E-09 | 10.55706083                 | 11.00516065                    |
| <i>RAP1GAP</i>  | 0.446396515 | 0.022193981 | 6.950829305                 | 7.397225821                    |
| <i>IL18R1</i>   | 0.445524977 | 2.55347E-06 | 8.059171477                 | 8.504696454                    |
| <i>ORM1</i>     | 0.442353108 | 0.000942118 | 7.440149376                 | 7.882502485                    |
| <i>SRPK1</i>    | 0.438107302 | 2.66729E-11 | 8.898342891                 | 9.336450193                    |
| <i>NCF4</i>     | 0.437260302 | 1.69249E-11 | 9.884838122                 | 10.32209842                    |
| <i>AIM2</i>     | 0.432280331 | 5.4121E-08  | 7.956836702                 | 8.389117034                    |
| <i>LILRA5</i>   | 0.424536712 | 1.79745E-06 | 8.354118687                 | 8.778655399                    |
| <i>CD38</i>     | 0.423254654 | 3.17277E-07 | 7.20179077                  | 7.625045425                    |
| <i>LMNB1</i>    | 0.423157123 | 1.24496E-07 | 8.427830474                 | 8.850987597                    |
| <i>MAPK14</i>   | 0.421593012 | 7.56556E-13 | 7.740514768                 | 8.16210778                     |
| <i>PROK2</i>    | 0.420877821 | 3.9668E-05  | 10.68359468                 | 11.1044725                     |
| <i>TDRD9</i>    | 0.417822893 | 8.80947E-07 | 6.346669074                 | 6.764491967                    |
| <i>OPLAH</i>    | 0.417184879 | 4.95911E-09 | 6.382304879                 | 6.799489758                    |
| <i>PGS1</i>     | 0.410643038 | 1.49663E-09 | 8.923383007                 | 9.334026045                    |
| <i>ITGAM</i>    | 0.409756277 | 4.92859E-08 | 10.12932605                 | 10.53908232                    |
| <i>ROPN1L</i>   | 0.40356398  | 1.0213E-06  | 7.698934839                 | 8.102498818                    |
| <i>ZDHHC19</i>  | 0.403439877 | 0.000251178 | 6.468977099                 | 6.872416976                    |
| <i>PADI4</i>    | 0.403283445 | 0.000192804 | 9.508143594                 | 9.911427039                    |
| <i>ALOX5</i>    | 0.40293372  | 3.09483E-10 | 9.813512016                 | 10.21644574                    |
| <i>PGD</i>      | 0.396597531 | 1.34264E-10 | 9.798157043                 | 10.19475457                    |

|                |             |             |             |             |
|----------------|-------------|-------------|-------------|-------------|
| <i>NLRC4</i>   | 0.39391055  | 2.67905E-07 | 7.442222912 | 7.836133462 |
| <i>ACSL1</i>   | 0.393697431 | 3.65216E-05 | 11.07606785 | 11.46976529 |
| <i>NSUN7</i>   | 0.392862574 | 2.70738E-08 | 6.358838235 | 6.751700809 |
| <i>CR1</i>     | 0.3890872   | 2.45655E-08 | 7.24722946  | 7.63631666  |
| <i>FES</i>     | 0.388639705 | 4.31838E-09 | 8.776010839 | 9.164650544 |
| <i>BCL6</i>    | 0.386924845 | 4.05327E-07 | 10.196683   | 10.58360785 |
| <i>FLOT2</i>   | 0.386591051 | 1.603E-10   | 10.98229231 | 11.36888336 |
| <i>DSC2</i>    | 0.383735673 | 1.99597E-06 | 7.128879515 | 7.512615188 |
| <i>SEMA4A</i>  | 0.382417686 | 7.09912E-07 | 8.985379636 | 9.367797322 |
| <i>ZNF438</i>  | 0.375359566 | 2.09E-09    | 7.354495773 | 7.729855339 |
| <i>RGL4</i>    | 0.37487343  | 3.54277E-06 | 8.650230568 | 9.025103999 |
| <i>SLC2A3</i>  | 0.372350882 | 1.78438E-07 | 11.76618566 | 12.13853654 |
| <i>SIGLEC5</i> | 0.372286702 | 3.46668E-07 | 8.073157291 | 8.445443993 |
| <i>KREMEN1</i> | 0.372211588 | 1.69249E-11 | 6.341041584 | 6.713253172 |
| <i>LIMK2</i>   | 0.369918291 | 4.76789E-11 | 7.786082083 | 8.156000374 |
| <i>FOLR3</i>   | 0.36905603  | 0.010654222 | 9.063981941 | 9.433037971 |
| <i>SLC22A4</i> | 0.366916761 | 8.23789E-05 | 8.169194021 | 8.536110782 |
| <i>MMP25</i>   | 0.366549733 | 1.0387E-05  | 9.60002801  | 9.966577743 |
| <i>OSM</i>     | 0.364642765 | 5.15621E-07 | 6.783064928 | 7.147707693 |
| <i>EMR1</i>    | 0.361954317 | 1.07586E-06 | 7.965107948 | 8.327062266 |
| <i>ALAS2</i>   | 0.360837094 | 0.000731335 | 10.55198248 | 10.91281958 |
| <i>VNN1</i>    | 0.360416387 | 0.000437581 | 7.461649956 | 7.822066343 |
| <i>CACNA1E</i> | 0.359536073 | 1.15051E-09 | 5.74061142  | 6.100147493 |
| <i>TLR8</i>    | 0.359494984 | 8.63562E-05 | 9.160627174 | 9.520122158 |
| <i>SHKBP1</i>  | 0.359337405 | 1.49663E-09 | 8.769828384 | 9.129165788 |
| <i>QPCT</i>    | 0.358446436 | 5.0582E-06  | 9.548193588 | 9.906640024 |
| <i>DHRS13</i>  | 0.356694512 | 4.50156E-08 | 8.227994282 | 8.584688794 |
| <i>NBEAL2</i>  | 0.354409078 | 1.59079E-10 | 8.384418006 | 8.738827084 |
| <i>PHTF1</i>   | 0.351937218 | 1.66903E-09 | 7.34051662  | 7.692453837 |
| <i>SLC9A8</i>  | 0.351861876 | 5.99275E-11 | 8.335170551 | 8.687032427 |
| <i>NARF</i>    | 0.351454336 | 1.06081E-11 | 8.786423734 | 9.13787807  |
| <i>ZNF467</i>  | 0.349783605 | 1.43137E-07 | 9.437153037 | 9.786936642 |
| <i>ALPK1</i>   | 0.346017678 | 1.85767E-07 | 8.405522838 | 8.751540516 |
| <i>BMX</i>     | 0.345138884 | 4.47804E-07 | 6.189094977 | 6.534233861 |
| <i>SH3BP5L</i> | 0.340174364 | 1.69249E-11 | 8.385706149 | 8.725880512 |
| <i>HCK</i>     | 0.339134997 | 2.23671E-06 | 10.61321141 | 10.95234641 |
| <i>CAMP</i>    | 0.33699352  | 0.003955915 | 8.815448239 | 9.152441759 |
| <i>FLOT1</i>   | 0.334452142 | 2.43105E-06 | 9.412929514 | 9.747381655 |
| <i>ENTPD1</i>  | 0.33201456  | 1.69889E-10 | 8.530765892 | 8.862780452 |
| <i>MGAM</i>    | 0.331432129 | 5.27502E-05 | 8.280238722 | 8.611670851 |
| <i>CLEC4D</i>  | 0.327729606 | 0.000637147 | 7.29097753  | 7.618707136 |
| <i>NFE2</i>    | 0.32772697  | 6.64201E-06 | 10.82074242 | 11.14846939 |
| <i>TRIM25</i>  | 0.324659117 | 4.87092E-08 | 9.160502763 | 9.48516188  |
| <i>LTB4R</i>   | 0.323530634 | 1.9807E-08  | 7.691904578 | 8.015435213 |
| <i>TKT</i>     | 0.322476756 | 1.54729E-08 | 11.03597882 | 11.35845558 |
| <i>WIP1I</i>   | 0.320649712 | 6.2423E-07  | 8.017630674 | 8.338280386 |
| <i>SLC11A1</i> | 0.320093453 | 0.000115681 | 9.262345272 | 9.582438725 |
| <i>SLC2A14</i> | 0.318946532 | 5.15621E-07 | 8.315336049 | 8.634282581 |
| <i>CDA</i>     | 0.314675767 | 0.000189084 | 9.218324119 | 9.532999886 |
| <i>RRM2</i>    | 0.312007626 | 4.67161E-08 | 6.031715152 | 6.343722779 |
| <i>ST3GAL4</i> | 0.311264784 | 2.59647E-07 | 6.713910628 | 7.025175412 |
| <i>SLC12A9</i> | 0.311103681 | 6.10527E-08 | 9.05796393  | 9.369067611 |
| <i>TMCO3</i>   | 0.310501963 | 9.47138E-08 | 7.494247563 | 7.804749527 |
| <i>GLT1D1</i>  | 0.310108646 | 2.67905E-07 | 8.092159316 | 8.402267963 |
| <i>TSPO</i>    | 0.309568703 | 5.35642E-08 | 10.79161228 | 11.10118098 |
| <i>CLEC5A</i>  | 0.307302843 | 0.001074801 | 6.633761208 | 6.941064051 |
| <i>BASPI1</i>  | 0.306188532 | 3.21517E-05 | 11.54734144 | 11.85352997 |
| <i>IL1R2</i>   | 0.3052626   | 0.012491378 | 8.663068235 | 8.968330835 |
| <i>LPAR2</i>   | 0.304085364 | 4.43208E-07 | 9.045355557 | 9.349440921 |

|                 |             |             |             |             |
|-----------------|-------------|-------------|-------------|-------------|
| <i>DGAT2</i>    | 0.303562676 | 1.89295E-06 | 8.027332058 | 8.330894733 |
| <i>CEACAMI</i>  | 0.303455592 | 0.000751594 | 7.745222219 | 8.048677812 |
| <i>OLAH</i>     | 0.302851714 | 0.000751085 | 5.331893853 | 5.634745568 |
| <i>HAUS4</i>    | 0.302844571 | 1.54729E-08 | 8.902346628 | 9.205191199 |
| <i>GLDC</i>     | 0.30281081  | 1.47467E-05 | 5.952594715 | 6.255405525 |
| <i>IMPDHI</i>   | 0.3011862   | 5.09888E-10 | 8.565631682 | 8.866817882 |
| <i>FAM160A2</i> | 0.301179459 | 1.61264E-10 | 8.302270485 | 8.603449944 |
| <i>NLRP12</i>   | 0.300387914 | 6.2423E-07  | 8.615806304 | 8.916194218 |
| <i>MKNK1</i>    | 0.300248346 | 1.46094E-07 | 8.592075648 | 8.892323995 |
| <i>CIRL</i>     | 0.299154615 | 4.95911E-09 | 8.014612433 | 8.313767048 |
| <i>PINK1</i>    | 0.297971297 | 5.64658E-05 | 9.03006312  | 9.328034417 |
| <i>TCN1</i>     | 0.29769511  | 0.003740096 | 7.078883023 | 7.376578134 |
| <i>OXER1</i>    | 0.297518427 | 2.09117E-10 | 7.104620788 | 7.402139215 |
| <i>GBA</i>      | 0.297137136 | 1.34264E-10 | 8.214856958 | 8.511994094 |
| <i>SBNO2</i>    | 0.296115686 | 2.39809E-07 | 7.739237612 | 8.035353298 |
| <i>SLCO4C1</i>  | 0.294064347 | 2.67905E-07 | 6.920659077 | 7.214723425 |
| <i>PSTPIP2</i>  | 0.292330946 | 0.000565769 | 8.917674192 | 9.210005138 |
| <i>INSC</i>     | 0.291562969 | 2.06374E-06 | 5.911033244 | 6.202596213 |
| <i>CDC20</i>    | 0.291149744 | 0.00047282  | 6.513446886 | 6.80459663  |
| <i>LRG1</i>     | 0.290934244 | 0.001080502 | 8.857271309 | 9.148205553 |
| <i>APOBEC3B</i> | 0.290688217 | 0.010350519 | 6.120736314 | 6.411424532 |
| <i>TGFA</i>     | 0.28999341  | 5.33046E-06 | 6.977355282 | 7.267348692 |
| <i>STX3</i>     | 0.289402882 | 4.49407E-06 | 9.435470876 | 9.724873758 |
| <i>P2RX1</i>    | 0.28807678  | 3.07288E-05 | 8.212461168 | 8.500537948 |
| <i>SIPA1L2</i>  | 0.286440651 | 0.002169658 | 7.949583087 | 8.236023738 |
| <i>CKAP4</i>    | 0.28582725  | 6.10413E-06 | 9.167124481 | 9.452951731 |
| <i>VNN2</i>     | 0.283647384 | 0.000252949 | 11.06651024 | 11.35015763 |
| <i>RAB24</i>    | 0.28363918  | 4.95911E-09 | 9.537403585 | 9.821042764 |
| <i>FRAT2</i>    | 0.283582592 | 2.46544E-07 | 11.05266405 | 11.33624664 |
| <i>TIMP2</i>    | 0.283502096 | 5.2229E-07  | 9.117527573 | 9.401029669 |
| <i>HPSE</i>     | 0.283434775 | 0.000104418 | 7.941912521 | 8.225347296 |
| <i>INPPL1</i>   | 0.28296292  | 1.54699E-08 | 8.533334068 | 8.816296988 |
| <i>XK</i>       | 0.282917863 | 0.035480548 | 7.615993854 | 7.898911716 |
| <i>PARP9</i>    | 0.282334319 | 4.42701E-05 | 9.341238827 | 9.623573146 |
| <i>NLRX1</i>    | 0.281622571 | 1.69249E-11 | 7.471836201 | 7.753458772 |
| <i>HSPA6</i>    | 0.281394474 | 1.80935E-05 | 9.794753252 | 10.07614773 |
| <i>LRP10</i>    | 0.280855282 | 2.21131E-06 | 10.89610993 | 11.17696521 |
| <i>S100A8</i>   | 0.280737542 | 0.000321918 | 12.68201687 | 12.96275441 |
| <i>GADD45A</i>  | 0.280262214 | 0.003526562 | 7.831028056 | 8.111290269 |
| <i>IL17RA</i>   | 0.278849001 | 1.99597E-06 | 9.565917394 | 9.844766396 |
| <i>FAM46C</i>   | 0.278420935 | 0.049086069 | 10.79152658 | 11.06994751 |
| <i>TSTA3</i>    | 0.277391345 | 0.013429649 | 8.283315407 | 8.560706752 |
| <i>ABTB1</i>    | 0.277028039 | 3.3346E-06  | 9.480887714 | 9.757915753 |
| <i>IRAK3</i>    | 0.27631415  | 0.002099181 | 8.425865648 | 8.702179798 |
| <i>RGS19</i>    | 0.275084979 | 5.74064E-10 | 9.628814156 | 9.903899135 |
| <i>TXN</i>      | 0.275049618 | 0.001643236 | 10.23163908 | 10.5066887  |
| <i>UBXN2B</i>   | 0.274882212 | 1.21892E-06 | 8.794581978 | 9.06946419  |
| <i>VSTMI</i>    | 0.273964486 | 0.00017883  | 7.465160907 | 7.739125393 |
| <i>TLR4</i>     | 0.27371033  | 0.000130931 | 8.673845076 | 8.947555406 |
| <i>LRPAP1</i>   | 0.272660018 | 1.89219E-08 | 7.855521526 | 8.128181544 |
| <i>NAIP</i>     | 0.272145978 | 1.64506E-05 | 7.5811907   | 7.853336678 |
| <i>BPI</i>      | 0.271879213 | 0.007158854 | 6.601172576 | 6.873051789 |
| <i>LRRN1</i>    | 0.271860258 | 7.36963E-06 | 5.634193274 | 5.906053532 |
| <i>MVP</i>      | 0.271700263 | 2.31231E-09 | 9.236772468 | 9.508472731 |
| <i>SLC22A15</i> | 0.271509094 | 0.000115034 | 7.576225576 | 7.84773467  |
| <i>RALB</i>     | 0.270759496 | 2.31026E-05 | 10.31118286 | 10.58194236 |
| <i>PFKFB2</i>   | 0.270386125 | 2.29263E-06 | 6.222337044 | 6.492723169 |
| <i>PHF21A</i>   | 0.270159762 | 2.24117E-08 | 9.874458426 | 10.14461819 |
| <i>STAT5B</i>   | 0.269939059 | 4.57226E-08 | 8.984594614 | 9.254533673 |

|                 |             |             |             |             |
|-----------------|-------------|-------------|-------------|-------------|
| <i>TYMP</i>     | 0.269917458 | 7.36963E-06 | 8.434345535 | 8.704262993 |
| <i>HK2</i>      | 0.269817845 | 1.44575E-08 | 7.803386854 | 8.073204699 |
| <i>JAK2</i>     | 0.269483317 | 1.87255E-06 | 7.691497584 | 7.960980901 |
| <i>TFDP1</i>    | 0.268856517 | 0.002838918 | 8.868586231 | 9.137442747 |
| <i>PRKCD</i>    | 0.268771346 | 1.49304E-07 | 9.79139806  | 10.06016941 |
| <i>SLC25A37</i> | 0.268765574 | 0.001190386 | 11.72858283 | 11.9973484  |
| <i>PGM1</i>     | 0.268181203 | 8.3549E-10  | 9.483879618 | 9.752060821 |
| <i>PQLC1</i>    | 0.268120365 | 1.68122E-05 | 9.51189445  | 9.780014815 |
| <i>AGPAT9</i>   | 0.267968767 | 0.000510484 | 9.224717315 | 9.492686082 |
| <i>NFIL3</i>    | 0.267962696 | 0.00017113  | 9.307348772 | 9.575311468 |
| <i>POR</i>      | 0.267528599 | 1.04077E-07 | 7.674738357 | 7.942266956 |
| <i>C17orf62</i> | 0.267060911 | 5.99275E-11 | 9.59852379  | 9.865584701 |
| <i>GRN</i>      | 0.266710244 | 1.32828E-05 | 10.32002416 | 10.5867344  |
| <i>IGLL1</i>    | 0.266272226 | 0.001939237 | 8.353194118 | 8.619466344 |
| <i>TECPR2</i>   | 0.265602003 | 3.99337E-07 | 7.19127039  | 7.456872393 |
| <i>GRAMD1A</i>  | 0.265242044 | 7.43131E-07 | 9.092860817 | 9.358102861 |
| <i>CCDC88B</i>  | 0.265222499 | 6.66141E-09 | 7.934935893 | 8.200158391 |
| <i>ACAA1</i>    | 0.263849123 | 1.86619E-11 | 8.802424626 | 9.066273749 |
| <i>CREB5</i>    | 0.263780294 | 8.80998E-06 | 8.010162315 | 8.27394261  |
| <i>FUT7</i>     | 0.26358641  | 5.79638E-07 | 6.7191998   | 6.982786211 |
| <i>EIF4E3</i>   | 0.263480475 | 5.18528E-07 | 9.438572901 | 9.702053376 |
| <i>APBB1IP</i>  | 0.262392353 | 4.58214E-08 | 9.988859958 | 10.25125231 |
| <i>PLSCR1</i>   | 0.26165013  | 0.002553824 | 7.530979108 | 7.792629238 |
| <i>PFKFB4</i>   | 0.26163934  | 0.000101239 | 9.105617224 | 9.367256565 |
| <i>MPP1</i>     | 0.260761288 | 0.010654222 | 11.04650694 | 11.30726822 |
| <i>DACHI</i>    | 0.260376542 | 3.34878E-08 | 5.739166733 | 5.999543274 |
| <i>SAMSN1</i>   | 0.260356724 | 0.00017135  | 7.621722544 | 7.882079268 |
| <i>FAM129A</i>  | 0.259219089 | 0.001380592 | 11.2607346  | 11.51995369 |
| <i>KIF1B</i>    | 0.258944832 | 3.62128E-05 | 7.619858045 | 7.878802877 |
| <i>GK</i>       | 0.258514355 | 0.001507171 | 8.929831224 | 9.188345578 |
| <i>SLAH2</i>    | 0.25808497  | 0.028885776 | 8.881428443 | 9.139513413 |
| <i>BATF2</i>    | 0.258007961 | 0.000442773 | 6.600992081 | 6.859000042 |
| <i>DDAH2</i>    | 0.257804769 | 4.43208E-07 | 7.394274681 | 7.652079449 |
| <i>GRINA</i>    | 0.257134226 | 0.001783652 | 8.93170942  | 9.188843646 |
| <i>SOCS3</i>    | 0.257118387 | 2.46544E-07 | 6.770877981 | 7.027996369 |
| <i>MYD88</i>    | 0.257012115 | 4.31064E-09 | 10.14308717 | 10.40009928 |
| <i>MICAL1</i>   | 0.25558278  | 1.76314E-06 | 8.928162887 | 9.183745667 |
| <i>TRPM6</i>    | 0.255084072 | 0.000101119 | 6.97350175  | 7.228585821 |
| <i>C10orf54</i> | 0.254726459 | 1.48805E-05 | 10.76834037 | 11.02306682 |
| <i>GRB10</i>    | 0.254544997 | 1.89311E-05 | 6.407137027 | 6.661682024 |
| <i>GPR160</i>   | 0.254297724 | 0.000800188 | 7.539515636 | 7.79381336  |
| <i>CDCA5</i>    | 0.254257398 | 4.6122E-06  | 6.323701065 | 6.577958464 |
| <i>MME</i>      | 0.254094585 | 0.000298688 | 9.020982412 | 9.275076997 |
| <i>QSOX1</i>    | 0.25352592  | 1.87229E-07 | 7.574367307 | 7.827893228 |
| <i>IFI35</i>    | 0.253121419 | 0.000760651 | 9.014895851 | 9.26801727  |
| <i>BCL3</i>     | 0.252381825 | 6.51459E-06 | 8.638110164 | 8.890491989 |
| <i>DNAJC5</i>   | 0.252178951 | 5.47229E-10 | 8.119979735 | 8.372158687 |
| <i>MANSC1</i>   | 0.251951585 | 0.001929489 | 7.897228056 | 8.149179641 |
| <i>ECHDC3</i>   | 0.251851601 | 0.00441294  | 7.134415732 | 7.386267333 |
| <i>ANKRD9</i>   | 0.251632158 | 0.010807736 | 7.191788314 | 7.443420472 |
| <i>TGM3</i>     | 0.251138159 | 0.004640986 | 7.124958851 | 7.376097011 |
| <i>CD55</i>     | 0.250798359 | 5.90675E-05 | 9.719011138 | 9.969809497 |
| <i>DENND3</i>   | 0.249673932 | 8.33919E-05 | 9.012021583 | 9.261695515 |
| <i>SRXN1</i>    | 0.249439724 | 0.005512924 | 9.003116266 | 9.25255599  |
| <i>MTMR3</i>    | 0.249109713 | 1.94054E-06 | 8.519955077 | 8.769064789 |
| <i>SFXN5</i>    | 0.24903822  | 6.08776E-09 | 6.656124652 | 6.905162872 |
| <i>TYMS</i>     | 0.248525334 | 0.000788784 | 6.497702657 | 6.746227991 |
| <i>CDC34</i>    | 0.248436712 | 0.013482962 | 8.747516455 | 8.995953166 |
| <i>CTSZ</i>     | 0.248013165 | 5.34807E-06 | 9.130035652 | 9.378048817 |

|                 |             |             |             |             |
|-----------------|-------------|-------------|-------------|-------------|
| <i>PLXNC1</i>   | 0.247560986 | 0.000123436 | 8.181717457 | 8.429278443 |
| <i>AQP9</i>     | 0.247286964 | 0.004158907 | 12.14680183 | 12.39408879 |
| <i>OSCAR</i>    | 0.246983775 | 1.33735E-05 | 8.762808308 | 9.009792083 |
| <i>NUCB1</i>    | 0.246829994 | 6.98012E-06 | 10.67978054 | 10.92661053 |
| <i>TRIB1</i>    | 0.246540162 | 1.89311E-05 | 8.132097208 | 8.378637371 |
| <i>GJB6</i>     | 0.244670774 | 1.31829E-06 | 5.523648723 | 5.768319497 |
| <i>CD163</i>    | 0.244610942 | 0.001648656 | 8.08032622  | 8.324937162 |
| <i>CRISPLD2</i> | 0.244048305 | 0.001034067 | 9.222956937 | 9.467005242 |
| <i>CBS</i>      | 0.244016107 | 0.000173569 | 6.453174996 | 6.697191103 |
| <i>ADAM8</i>    | 0.243981239 | 7.93746E-06 | 9.086176161 | 9.3301574   |
| <i>KLHL2</i>    | 0.243423481 | 0.000708328 | 8.895782057 | 9.139205538 |
| <i>CYTH4</i>    | 0.242917925 | 1.54928E-06 | 9.877665984 | 10.12058391 |
| <i>FKBP5</i>    | 0.242322065 | 0.01905276  | 10.0522086  | 10.29453067 |
| <i>ATP9A</i>    | 0.241365481 | 0.002636895 | 6.780136499 | 7.02150198  |
| <i>HK1</i>      | 0.241266071 | 8.84187E-05 | 9.411649976 | 9.652916048 |
| <i>NLRC5</i>    | 0.241171252 | 1.58141E-08 | 8.6843662   | 8.925537452 |
| <i>DOK3</i>     | 0.24112623  | 1.31528E-05 | 7.801933727 | 8.043059957 |
| <i>DGCR2</i>    | 0.240746092 | 2.92144E-10 | 8.360729649 | 8.601475741 |
| <i>SIPR4</i>    | 0.239933558 | 1.07161E-07 | 9.728773259 | 9.968706817 |
| <i>VAV1</i>     | 0.239931084 | 4.62784E-06 | 9.176291842 | 9.416222926 |
| <i>GRK6</i>     | 0.239878623 | 4.70613E-09 | 8.259551202 | 8.499429825 |
| <i>NFIX</i>     | 0.239496478 | 0.025033648 | 7.024515737 | 7.264012215 |
| <i>TMEM86B</i>  | 0.23907551  | 0.007752062 | 7.85041515  | 8.089490661 |
| <i>GBGT1</i>    | 0.238714068 | 0.000133045 | 7.855549611 | 8.094263678 |
| <i>PLEK2</i>    | 0.238197529 | 0.049279473 | 7.700346255 | 7.938543784 |
| <i>NOD2</i>     | 0.23789994  | 0.000778966 | 8.5538458   | 8.79174574  |
| <i>RAB43</i>    | 0.23758604  | 1.15051E-09 | 6.982598016 | 7.220184056 |
| <i>SORT1</i>    | 0.23755616  | 0.000322261 | 7.91206157  | 8.14961773  |
| <i>NADK</i>     | 0.236947169 | 5.07624E-05 | 9.31631851  | 9.553265679 |
| <i>RNF10</i>    | 0.236591273 | 0.024514203 | 10.13385313 | 10.37044441 |
| <i>B4GALT5</i>  | 0.235140457 | 0.001689724 | 10.42835563 | 10.66349609 |
| <i>RBP7</i>     | 0.234893897 | 0.000216944 | 8.129456354 | 8.364350251 |
| <i>LIN7A</i>    | 0.234717534 | 4.2858E-05  | 6.865950885 | 7.100668419 |
| <i>RAB31</i>    | 0.234618344 | 0.000510484 | 11.05441178 | 11.28903012 |
| <i>GPRC5D</i>   | 0.234524794 | 1.27588E-06 | 5.858048238 | 6.092573032 |
| <i>PADI2</i>    | 0.233772109 | 5.53054E-05 | 7.237608    | 7.47138011  |
| <i>TK1</i>      | 0.233682677 | 9.81714E-06 | 6.403318875 | 6.637001552 |
| <i>PNPLA2</i>   | 0.233353122 | 0.005538219 | 8.552762616 | 8.786115738 |
| <i>TAPI</i>     | 0.233150403 | 4.85224E-05 | 11.09313322 | 11.32628362 |
| <i>SMARCD3</i>  | 0.233007087 | 8.3026E-09  | 6.852246957 | 7.085254044 |
| <i>SLC7A5</i>   | 0.23293947  | 0.030628124 | 8.30512201  | 8.53806148  |
| <i>LRRC6</i>    | 0.231877938 | 0.002807559 | 6.616973322 | 6.84885126  |
| <i>DHRS12</i>   | 0.231367112 | 1.03987E-08 | 7.167581064 | 7.398948176 |
| <i>MXD1</i>     | 0.230454244 | 0.00114685  | 11.1926036  | 11.42305785 |
| <i>GCA</i>      | 0.230391166 | 0.001353797 | 11.48366986 | 11.71406102 |
| <i>PPP1R3D</i>  | 0.230231154 | 2.95177E-07 | 7.973823745 | 8.204054899 |
| <i>B3GNT8</i>   | 0.230092742 | 2.27397E-06 | 6.784633198 | 7.01472594  |
| <i>SH3GLB1</i>  | 0.229498449 | 5.60153E-05 | 10.09594199 | 10.32544044 |
| <i>IQSEC1</i>   | 0.228937822 | 4.50156E-08 | 9.497290639 | 9.726228461 |
| <i>FAM126B</i>  | 0.228914974 | 0.000637254 | 8.33778984  | 8.566704814 |
| <i>CMTM2</i>    | 0.228911724 | 0.012558841 | 9.98764059  | 10.21655231 |
| <i>EIF4G3</i>   | 0.228726821 | 3.58934E-09 | 8.157885764 | 8.386612585 |
| <i>GNG10</i>    | 0.228381182 | 0.005235527 | 9.797911574 | 10.02629276 |
| <i>DOK4</i>     | 0.228285541 | 1.44575E-08 | 6.169923737 | 6.398209278 |
| <i>IER3</i>     | 0.228255962 | 0.000741737 | 8.996133783 | 9.224389745 |
| <i>FFAR2</i>    | 0.228130357 | 0.026679872 | 9.747138291 | 9.975268648 |
| <i>RRBP1</i>    | 0.227895566 | 3.36184E-09 | 7.356689467 | 7.584585033 |
| <i>RNF24</i>    | 0.227847206 | 0.000419696 | 9.761150278 | 9.988997484 |
| <i>CDKN2D</i>   | 0.2275276   | 9.28186E-05 | 8.669324792 | 8.896852392 |

|                  |             |             |              |             |
|------------------|-------------|-------------|--------------|-------------|
| <i>FAM53C</i>    | 0.227308079 | 0.000124886 | 9.919431538  | 10.14673962 |
| <i>CCL23</i>     | 0.227204795 | 0.003522873 | 5.551103638  | 5.778308433 |
| <i>TREML2</i>    | 0.227180781 | 8.23789E-05 | 8.002757121  | 8.229937903 |
| <i>PLB1</i>      | 0.226808131 | 2.57259E-05 | 6.32214376   | 6.548951891 |
| <i>ABCA7</i>     | 0.226424311 | 1.33735E-05 | 7.542519536  | 7.768943847 |
| <i>TMEM120A</i>  | 0.226224117 | 0.000126662 | 8.627300982  | 8.853525099 |
| <i>CRISP3</i>    | 0.226110147 | 0.010053965 | 5.981985729  | 6.208095876 |
| <i>FAM160B1</i>  | 0.224571413 | 7.78498E-09 | 7.920683421  | 8.145254835 |
| <i>PNPLA6</i>    | 0.224232552 | 2.32358E-05 | 8.783386023  | 9.007618575 |
| <i>FNDC3B</i>    | 0.224131101 | 0.000178212 | 8.58871031   | 8.812841411 |
| <i>ATG16L2</i>   | 0.224004464 | 0.000906448 | 9.087841288  | 9.311845752 |
| <i>MCOLN1</i>    | 0.223627983 | 0.012135676 | 8.482123643  | 8.705751626 |
| <i>HPCAL1</i>    | 0.223627635 | 1.50755E-07 | 9.212876487  | 9.436504122 |
| <i>NPEPL1</i>    | 0.223601938 | 7.68582E-06 | 8.574683184  | 8.798285122 |
| <i>THOC5</i>     | 0.223063546 | 6.05197E-09 | 8.077836382  | 8.300899928 |
| <i>SIGLEC9</i>   | 0.223049441 | 6.22556E-05 | 7.494431176  | 7.717480618 |
| <i>PHKA2</i>     | 0.222926774 | 7.12324E-07 | 8.077947829  | 8.300874603 |
| <i>ARHGAP4</i>   | 0.222762041 | 1.93211E-05 | 9.484257174  | 9.707019215 |
| <i>ALDH2</i>     | 0.22254299  | 0.001469273 | 9.040690468  | 9.263233457 |
| <i>STX10</i>     | 0.222520949 | 2.67905E-07 | 9.321152277  | 9.543673226 |
| <i>CHPT1</i>     | 0.222431137 | 0.032541625 | 9.280687899  | 9.503119036 |
| <i>TP53III1</i>  | 0.222391351 | 1.22296E-08 | 6.500116011  | 6.722507362 |
| <i>ITM2C</i>     | 0.222153879 | 0.001324913 | 8.481427242  | 8.703581121 |
| <i>CEBPE</i>     | 0.221870656 | 0.000352604 | 6.660033682  | 6.881904338 |
| <i>TBC1D2</i>    | 0.22184574  | 8.38199E-05 | 7.687512572  | 7.909358312 |
| <i>MYO1F</i>     | 0.221574849 | 0.00018589  | 9.77070526   | 9.992280108 |
| <i>MYBPC3</i>    | 0.221390256 | 9.55142E-05 | 7.05870626   | 7.280096516 |
| <i>PANX2</i>     | 0.220683845 | 0.001744333 | 8.249982803  | 8.470666647 |
| <i>ARHGAP9</i>   | 0.22038498  | 1.51841E-06 | 10.81048635  | 11.03087133 |
| <i>MSL1</i>      | 0.219656771 | 6.50802E-06 | 8.394850472  | 8.614507243 |
| <i>LHFPL2</i>    | 0.219289603 | 0.01381404  | 7.909374853  | 8.128664456 |
| <i>CYP4F12</i>   | 0.218698184 | 1.34625E-05 | 5.893335379  | 6.112033563 |
| <i>G0S2</i>      | 0.217939336 | 0.001757239 | 6.514153031  | 6.732092368 |
| <i>TOP2A</i>     | 0.217535995 | 0.00023466  | 5.725998429  | 5.943534424 |
| <i>ITLN1</i>     | 0.217474908 | 0.04851368  | 6.412406837  | 6.629881745 |
| <i>SCO2</i>      | 0.217452966 | 0.000686897 | 8.674233667  | 8.891686634 |
| <i>TLR6</i>      | 0.217211171 | 0.000167063 | 8.381962345  | 8.599173516 |
| <i>CCPG1</i>     | 0.217100044 | 8.03678E-05 | 8.406932447  | 8.624032491 |
| <i>BST1</i>      | 0.216844606 | 0.000654153 | 8.45131377   | 8.668158376 |
| <i>ZNF319</i>    | 0.216535456 | 7.62797E-07 | 8.283048618  | 8.499584074 |
| <i>NAMPT</i>     | 0.21564015  | 0.023735926 | 11.24971146  | 11.46535161 |
| <i>UPP1</i>      | 0.215569809 | 0.000268601 | 8.717320616  | 8.932890425 |
| <i>RGS14</i>     | 0.215489915 | 3.36888E-09 | 7.624300967  | 7.839790882 |
| <i>AMICA1</i>    | 0.21547747  | 2.44653E-06 | 11.71789612  | 11.93337359 |
| <i>AGTRAP</i>    | 0.215382609 | 2.65047E-06 | 8.745815298  | 8.961197907 |
| <i>ETS2</i>      | 0.214987623 | 0.001067384 | 8.480546147  | 8.69553377  |
| <i>USF1</i>      | 0.2148271   | 4.66149E-06 | 7.692914807  | 7.907741908 |
| <i>AGTPBP1</i>   | 0.213700338 | 3.17346E-05 | 8.849972861  | 9.063673199 |
| <i>RHD</i>       | 0.213112564 | 0.003997057 | 6.160657601  | 6.373770165 |
| <i>ZYX</i>       | 0.212986103 | 2.84706E-05 | 10.511117144 | 10.72415754 |
| <i>TFF3</i>      | 0.212104054 | 0.000216864 | 6.149281099  | 6.361385152 |
| <i>STX11</i>     | 0.211775297 | 0.000991323 | 9.647427951  | 9.859203247 |
| <i>HIST2H2BE</i> | 0.211455829 | 0.006878112 | 9.518582389  | 9.730038219 |
| <i>CD24</i>      | 0.211379096 | 0.018236426 | 7.802791578  | 8.014170675 |
| <i>DRAM1</i>     | 0.211328171 | 0.000655201 | 7.866775966  | 8.078104137 |
| <i>TMEM2</i>     | 0.211291511 | 2.8924E-05  | 9.129770855  | 9.341062365 |
| <i>IL1RN</i>     | 0.211134625 | 0.005558696 | 7.963900529  | 8.175035154 |
| <i>KEL</i>       | 0.211034104 | 0.025700805 | 6.57230625   | 6.783340354 |
| <i>CCNB2</i>     | 0.210894861 | 0.000401577 | 5.684816691  | 5.895711552 |

|                 |             |             |             |             |
|-----------------|-------------|-------------|-------------|-------------|
| <i>ARID3A</i>   | 0.210331779 | 9.72092E-06 | 8.71671593  | 8.927047708 |
| <i>CD274</i>    | 0.21010639  | 0.008062774 | 6.339293108 | 6.549399498 |
| <i>LPCAT2</i>   | 0.209545881 | 0.018538202 | 7.851718969 | 8.06126485  |
| <i>UBN1</i>     | 0.208935276 | 8.83816E-05 | 9.819645691 | 10.02858097 |
| <i>FBXL5</i>    | 0.208143818 | 4.25679E-05 | 9.484619041 | 9.692762859 |
| <i>HDAC4</i>    | 0.208006701 | 7.36963E-06 | 7.963039414 | 8.171046115 |
| <i>RPH3A</i>    | 0.207477241 | 0.001828814 | 6.421809131 | 6.629286372 |
| <i>ERII</i>     | 0.207433594 | 6.64201E-06 | 6.75170867  | 6.959142264 |
| <i>PPP1R3B</i>  | 0.207183093 | 4.23135E-07 | 6.841855903 | 7.049038996 |
| <i>YIPF1</i>    | 0.207028063 | 6.08776E-09 | 9.14033844  | 9.347366503 |
| <i>DDX60L</i>   | 0.206922625 | 0.005866369 | 8.587412183 | 8.794334809 |
| <i>PDK3</i>     | 0.206907488 | 2.67905E-07 | 8.104521921 | 8.31142941  |
| <i>ORAI2</i>    | 0.20597725  | 3.51196E-06 | 7.27177709  | 7.47775434  |
| <i>SLC40A1</i>  | 0.205367585 | 0.000378977 | 8.975949349 | 9.181316934 |
| <i>HSPA1A</i>   | 0.205216629 | 0.003922027 | 10.594673   | 10.79988963 |
| <i>SAMD9L</i>   | 0.205199582 | 0.020917589 | 9.025986807 | 9.231186389 |
| <i>TBC1D8</i>   | 0.204929087 | 0.000804578 | 7.418300941 | 7.623230028 |
| <i>PCNX</i>     | 0.204338782 | 0.000173573 | 9.336829006 | 9.541167788 |
| <i>SLC38A5</i>  | 0.204051299 | 0.047645415 | 7.307564248 | 7.511615547 |
| <i>CARD6</i>    | 0.203969487 | 0.000320599 | 7.230250324 | 7.43421981  |
| <i>MPO</i>      | 0.203718632 | 0.035103846 | 6.389565361 | 6.593283993 |
| <i>MLKL</i>     | 0.20355518  | 1.94054E-06 | 9.128813557 | 9.332368737 |
| <i>COL18A1</i>  | 0.203415649 | 6.32903E-05 | 6.998430181 | 7.20184583  |
| <i>CEACAM3</i>  | 0.203368551 | 0.000942118 | 7.975551886 | 8.178920437 |
| <i>RXRA</i>     | 0.2032459   | 0.000147329 | 10.16102127 | 10.36426717 |
| <i>HIST1H3F</i> | 0.202965959 | 0.000690543 | 6.682240745 | 6.885206704 |
| <i>ANKRD55</i>  | 0.202580134 | 0.004604274 | 7.06847083  | 7.271050964 |
| <i>HMHA1</i>    | 0.202341065 | 0.000111191 | 9.823760913 | 10.02610198 |
| <i>RHOG</i>     | 0.202315428 | 4.14463E-05 | 11.49054361 | 11.69285904 |
| <i>ADCY4</i>    | 0.201945389 | 0.000106879 | 7.072212159 | 7.274157548 |
| <i>GNB2</i>     | 0.201694094 | 1.41581E-05 | 8.366968    | 8.568662094 |
| <i>OSBPL1A</i>  | 0.201277927 | 2.21E-05    | 6.705589632 | 6.906867559 |
| <i>RRP12</i>    | 0.201096717 | 5.40583E-05 | 7.404674776 | 7.605771493 |
| <i>KIAA0513</i> | 0.200989943 | 0.000825569 | 8.555005174 | 8.755995117 |
| <i>CAMKK2</i>   | 0.200975804 | 0.001246921 | 7.609859722 | 7.810835526 |
| <i>ACTN1</i>    | 0.200942025 | 0.005538219 | 10.2942787  | 10.49522072 |
| <i>CDK5RAP2</i> | 0.200749297 | 0.000408112 | 7.644308174 | 7.84505747  |

**Supplementary Table S4.** Downregulated genes in ulcerative colitis.

| Gene            | logFC        | adj.P.Val   | Mean expression in controls | Mean expression in UC patients |
|-----------------|--------------|-------------|-----------------------------|--------------------------------|
| <i>GZMK</i>     | -0.54276969  | 1.36235E-07 | 9.907031269                 | 9.36426158                     |
| <i>KLRF1</i>    | -0.489193299 | 2.23671E-06 | 8.23665076                  | 7.747457461                    |
| <i>KLRB1</i>    | -0.42863301  | 5.18528E-07 | 10.34694654                 | 9.918313527                    |
| <i>GNLY</i>     | -0.404578475 | 0.000926396 | 10.6946354                  | 10.29005692                    |
| <i>KLRG1</i>    | -0.399836009 | 1.72281E-06 | 8.456951263                 | 8.057115254                    |
| <i>CD160</i>    | -0.391252154 | 6.78365E-05 | 7.758430009                 | 7.367177855                    |
| <i>HLA-DOA1</i> | -0.371479379 | 0.002765094 | 9.724728109                 | 9.35324873                     |
| <i>KLRD1</i>    | -0.339451691 | 0.000260573 | 8.49240285                  | 8.152951159                    |
| <i>PTGDS</i>    | -0.337111393 | 0.000147503 | 7.711196531                 | 7.374085139                    |
| <i>FCERIA</i>   | -0.332440652 | 0.002512556 | 8.418384059                 | 8.085943406                    |
| <i>CTSW</i>     | -0.325435743 | 1.31528E-05 | 9.23189858                  | 8.906462837                    |
| <i>HLA-DPA1</i> | -0.3201186   | 0.000221982 | 11.80595714                 | 11.48583854                    |
| <i>MYBL1</i>    | -0.317768972 | 1.24381E-06 | 7.656253717                 | 7.338484745                    |
| <i>CA5B</i>     | -0.308290893 | 2.46878E-09 | 7.59338578                  | 7.285094887                    |
| <i>CD3E</i>     | -0.306815722 | 1.45354E-05 | 8.852528321                 | 8.545712599                    |
| <i>GZMA</i>     | -0.29758902  | 0.009519174 | 10.09432594                 | 9.796736919                    |
| <i>IL7R</i>     | -0.288687648 | 0.000347764 | 11.85845342                 | 11.56976577                    |
| <i>PTGS2</i>    | -0.288022055 | 0.008207209 | 8.603039734                 | 8.315017679                    |
| <i>AUTS2</i>    | -0.285023166 | 2.71035E-08 | 7.561458138                 | 7.276434973                    |
| <i>TSPAN13</i>  | -0.282742106 | 9.17176E-06 | 7.811237897                 | 7.528495791                    |
| <i>SH2D1A</i>   | -0.28190911  | 3.31699E-05 | 8.852347232                 | 8.570438122                    |
| <i>MPZL1</i>    | -0.280733464 | 1.06822E-05 | 7.558497218                 | 7.277763754                    |
| <i>CD96</i>     | -0.28013543  | 2.21E-05    | 9.073561077                 | 8.793425647                    |
| <i>P2RY10</i>   | -0.276787555 | 4.13517E-06 | 7.842649038                 | 7.565861484                    |
| <i>CCL3</i>     | -0.271744826 | 0.006357717 | 7.310466509                 | 7.038721683                    |
| <i>RPL21</i>    | -0.270778037 | 0.001069545 | 11.60423728                 | 11.33345924                    |
| <i>TRAT1</i>    | -0.268016459 | 9.11559E-05 | 8.320151464                 | 8.052135005                    |
| <i>CHST7</i>    | -0.265911956 | 4.79986E-06 | 8.538227044                 | 8.272315088                    |
| <i>AKR1C3</i>   | -0.265182199 | 0.003616443 | 7.842526254                 | 7.577344054                    |
| <i>SI00A10</i>  | -0.265122354 | 1.23252E-07 | 11.69800773                 | 11.43288537                    |
| <i>TGFBR3</i>   | -0.263975614 | 0.004591377 | 8.70914557                  | 8.445169956                    |
| <i>RASGRP1</i>  | -0.260369244 | 2.64051E-05 | 9.770539584                 | 9.510170339                    |
| <i>PLEKHA1</i>  | -0.258868605 | 1.31237E-05 | 8.74045332                  | 8.481584714                    |
| <i>CD69</i>     | -0.258087885 | 0.000197454 | 8.326335599                 | 8.068247714                    |
| <i>TARP</i>     | -0.25677345  | 0.001559009 | 8.312093786                 | 8.055320336                    |
| <i>RPL31</i>    | -0.256231413 | 0.009941562 | 10.99303656                 | 10.73680515                    |
| <i>CD2</i>      | -0.25411501  | 0.000370669 | 10.61316112                 | 10.35904611                    |
| <i>RPS28</i>    | -0.25376374  | 0.00150051  | 11.33465859                 | 11.08089485                    |
| <i>CCR3</i>     | -0.248476437 | 0.008615783 | 7.791092488                 | 7.542616051                    |
| <i>SH2D1B</i>   | -0.247954883 | 0.003896324 | 7.447422982                 | 7.199468099                    |
| <i>PTGDR</i>    | -0.244788646 | 0.00011061  | 7.443450309                 | 7.198661662                    |
| <i>GPR183</i>   | -0.242566097 | 2.53244E-07 | 8.048560943                 | 7.805994846                    |
| <i>CLEC7A</i>   | -0.242559574 | 0.000246511 | 7.795481357                 | 7.552921783                    |
| <i>NCR3</i>     | -0.240255468 | 1.15639E-05 | 7.50649351                  | 7.266238041                    |
| <i>EIF1AX</i>   | -0.239017579 | 2.26597E-05 | 7.949247445                 | 7.710229866                    |
| <i>IL32</i>     | -0.238553848 | 0.001828814 | 9.891016147                 | 9.652462299                    |
| <i>NKG7</i>     | -0.237356426 | 0.038335796 | 11.58810348                 | 11.35074705                    |
| <i>CHI3L1</i>   | -0.236903718 | 0.015224825 | 7.868792769                 | 7.631889051                    |
| <i>CPA3</i>     | -0.235516285 | 0.021642097 | 6.755773986                 | 6.520257701                    |
| <i>RNF125</i>   | -0.234940201 | 4.2856E-07  | 7.946358499                 | 7.711418298                    |
| <i>PRF1</i>     | -0.232692903 | 0.023564455 | 10.40708561                 | 10.1743927                     |
| <i>GRAMD1C</i>  | -0.231810705 | 0.002220592 | 6.439380764                 | 6.207570059                    |
| <i>MCOLN2</i>   | -0.231317228 | 0.000123773 | 7.821073146                 | 7.589755917                    |
| <i>KLRC3</i>    | -0.230633607 | 0.000708328 | 6.720063406                 | 6.489429799                    |
| <i>GATA3</i>    | -0.230507152 | 1.6067E-06  | 7.630519094                 | 7.400011942                    |
| <i>C8orf59</i>  | -0.229617894 | 0.002155632 | 8.338626791                 | 8.109008897                    |

|                 |              |             |             |             |
|-----------------|--------------|-------------|-------------|-------------|
| <i>NOP58</i>    | -0.229585782 | 8.44914E-06 | 9.371342682 | 9.1417569   |
| <i>ADRB2</i>    | -0.228547067 | 1.72213E-06 | 8.903860282 | 8.675313215 |
| <i>CD40LG</i>   | -0.228405082 | 0.000425307 | 7.126630124 | 6.898225041 |
| <i>SAMD3</i>    | -0.228132054 | 0.000385215 | 8.175052023 | 7.946919969 |
| <i>RPL9</i>     | -0.227181478 | 0.002026958 | 11.6460882  | 11.41890673 |
| <i>STAT4</i>    | -0.226992083 | 0.000589996 | 9.774462903 | 9.54747082  |
| <i>NUCKS1</i>   | -0.225654143 | 5.18323E-06 | 9.211769656 | 8.986115513 |
| <i>IFFO2</i>    | -0.225417002 | 1.01949E-06 | 7.052705213 | 6.827288211 |
| <i>PTMA</i>     | -0.225100116 | 0.004898902 | 10.37547467 | 10.15037455 |
| <i>HLA-DOB</i>  | -0.222973332 | 0.001061637 | 7.56509302  | 7.342119688 |
| <i>TTC39C</i>   | -0.222950076 | 2.43827E-06 | 8.265109188 | 8.042159112 |
| <i>EOMES</i>    | -0.222861811 | 0.004266778 | 9.502013988 | 9.279152177 |
| <i>RRN3</i>     | -0.222701085 | 9.89117E-06 | 8.299957865 | 8.07725678  |
| <i>SKAPI</i>    | -0.221954305 | 0.000413285 | 9.091830243 | 8.869875939 |
| <i>NMT2</i>     | -0.221163044 | 5.39355E-05 | 7.585102519 | 7.363939475 |
| <i>PID1</i>     | -0.22080855  | 0.000149764 | 7.205741346 | 6.984932796 |
| <i>CD3G</i>     | -0.220560979 | 0.002155632 | 8.993425592 | 8.772864613 |
| <i>ID2</i>      | -0.220198424 | 0.000126113 | 9.611190037 | 9.390991613 |
| <i>LSM5</i>     | -0.21915743  | 0.00044188  | 7.696933159 | 7.47777573  |
| <i>ZMYM6</i>    | -0.218604065 | 8.49709E-09 | 7.896991879 | 7.678387814 |
| <i>ANKRD36B</i> | -0.218541086 | 6.2904E-05  | 7.807467528 | 7.588926442 |
| <i>OGFRL1</i>   | -0.218509598 | 3.17048E-05 | 8.758265371 | 8.539755773 |
| <i>TMEM14B</i>  | -0.218168068 | 3.45803E-05 | 9.671896371 | 9.453728302 |
| <i>NOL10</i>    | -0.21689355  | 0.001755439 | 7.480620487 | 7.263726937 |
| <i>RORA</i>     | -0.216699292 | 6.16654E-09 | 7.068316707 | 6.851617415 |
| <i>ATP2B1</i>   | -0.215845199 | 1.53701E-06 | 7.966717295 | 7.750872095 |
| <i>RPS6KA5</i>  | -0.214681069 | 0.000251178 | 8.105657336 | 7.890976266 |
| <i>AHR</i>      | -0.213609323 | 0.00093433  | 9.78666326  | 9.573053937 |
| <i>RFTN1</i>    | -0.213507116 | 0.000223391 | 9.038212533 | 8.824705417 |
| <i>ZNF721</i>   | -0.213504892 | 0.000751594 | 8.546893681 | 8.333388789 |
| <i>ZNF264</i>   | -0.212412293 | 1.63124E-05 | 7.860387005 | 7.647974712 |
| <i>TNF</i>      | -0.212212278 | 0.001140163 | 7.831848163 | 7.619635886 |
| <i>RPL14</i>    | -0.211941234 | 0.002648929 | 10.21741908 | 10.00547785 |
| <i>MRPL50</i>   | -0.210661184 | 0.000307635 | 7.647633777 | 7.436972593 |
| <i>CCDC65</i>   | -0.209807238 | 4.96873E-06 | 6.357679344 | 6.147872106 |
| <i>UBE2Q2</i>   | -0.209056569 | 0.000119852 | 8.927351504 | 8.718294935 |
| <i>ZNF91</i>    | -0.208925003 | 0.003597411 | 8.180767487 | 7.971842484 |
| <i>PTS</i>      | -0.208721244 | 1.05735E-07 | 7.303407842 | 7.094686598 |
| <i>SET</i>      | -0.208704243 | 0.00179556  | 10.44982836 | 10.24112412 |
| <i>CD4</i>      | -0.208348005 | 0.000637254 | 7.835288147 | 7.626940141 |
| <i>DUSP6</i>    | -0.207581161 | 0.000560809 | 10.0698464  | 9.86226524  |
| <i>KIAA0355</i> | -0.20752139  | 6.27592E-07 | 8.604726028 | 8.397204637 |
| <i>SYTL2</i>    | -0.207430191 | 0.000178212 | 7.07508954  | 6.867659349 |
| <i>RPL37A</i>   | -0.207152508 | 0.00018589  | 11.06648827 | 10.85933576 |
| <i>ID3</i>      | -0.206962108 | 0.00143894  | 7.844590767 | 7.637628659 |
| <i>TMEM138</i>  | -0.205743156 | 0.000939319 | 7.933335087 | 7.727591931 |
| <i>ZNF329</i>   | -0.205707208 | 3.55135E-06 | 7.307791008 | 7.1020838   |
| <i>HOPX</i>     | -0.205382887 | 0.000363599 | 7.072362809 | 6.866979922 |
| <i>RPL10A</i>   | -0.205320269 | 0.000192804 | 12.27000936 | 12.06468909 |
| <i>INPP4B</i>   | -0.204990579 | 0.000408112 | 7.323063626 | 7.118073047 |
| <i>FAM175A</i>  | -0.204155368 | 0.029281898 | 9.248603505 | 9.044448136 |
| <i>BCL11A</i>   | -0.203832284 | 3.19595E-05 | 8.101942862 | 7.898110578 |
| <i>JARID2</i>   | -0.203514837 | 2.04037E-06 | 9.430487581 | 9.226972744 |
| <i>RBM34</i>    | -0.202669902 | 4.64634E-05 | 6.9967494   | 6.794079498 |
| <i>SIPRI</i>    | -0.201744003 | 0.000939319 | 9.086815035 | 8.885071033 |
| <i>FRG1</i>     | -0.201711744 | 0.000286386 | 8.724795137 | 8.523083393 |
| <i>GPR174</i>   | -0.201515187 | 5.43888E-05 | 6.390506685 | 6.188991497 |
| <i>RPL15</i>    | -0.201464109 | 0.00584629  | 11.30178073 | 11.10031662 |
| <i>CDKN1C</i>   | -0.201219373 | 0.002790693 | 7.572380021 | 7.371160649 |

|              |              |             |             |            |
|--------------|--------------|-------------|-------------|------------|
| <i>PCID2</i> | -0.200837865 | 5.12704E-06 | 9.408071255 | 9.20723339 |
|--------------|--------------|-------------|-------------|------------|

**Supplementary Table S5.** Comprehensive list of miRNAs targeting hub genes of the PPI network of CD.

| miRNA            | Gene Symbols (target score)                |
|------------------|--------------------------------------------|
| hsa-miR-106a-5p  | IRF9(94) , CD69(91) , IRF1(89) , CD274(87) |
| hsa-miR-106b-5p  | IRF9(95) , CD69(93) , IRF1(89) , CD274(87) |
| hsa-miR-17-5p    | IRF9(94) , CD69(91) , IRF1(89) , CD274(87) |
| hsa-miR-20a-5p   | IRF9(95) , CD69(93) , IRF1(89) , CD274(87) |
| hsa-miR-20b-5p   | IRF9(94) , CD69(91) , IRF1(89) , CD274(87) |
| hsa-miR-519d-3p  | IRF9(94) , CD69(91) , IRF1(89) , CD274(87) |
| hsa-miR-93-5p    | IRF9(94) , CD69(91) , IRF1(89) , CD274(87) |
| hsa-miR-130a-3p  | IRF1(94) , CD69(91) , FYN(83)              |
| hsa-miR-130b-3p  | IRF1(94) , CD69(93) , FYN(87)              |
| hsa-miR-1827     | MYC(92) , STAT5B(83) , EIF2AK2(83)         |
| hsa-miR-301a-3p  | IRF1(94) , CD69(91) , FYN(83)              |
| hsa-miR-301b-3p  | IRF1(94) , CD69(91) , FYN(83)              |
| hsa-miR-454-3p   | IRF1(96) , CD69(93) , FYN(86)              |
| hsa-miR-105-5p   | CD274(89) , CD40LG(88)                     |
| hsa-miR-1304-5p  | MYC(96) , STAT5B(96)                       |
| hsa-miR-15a-5p   | IL7R(82) , CD3E(81)                        |
| hsa-miR-15b-5p   | IL7R(82) , CD3E(81)                        |
| hsa-miR-16-5p    | IL7R(82) , CD3E(81)                        |
| hsa-miR-195-5p   | IL7R(82) , CD3E(81)                        |
| hsa-miR-204-5p   | IL7R(96) , JAK2(91)                        |
| hsa-miR-211-5p   | IL7R(96) , JAK2(91)                        |
| hsa-miR-2682-5p  | MYC(90) , CD40LG(85)                       |
| hsa-miR-328-3p   | EIF2AK2(87) , PRF1(82)                     |
| hsa-miR-34b-5p   | MYC(91) , CD40LG(89)                       |
| hsa-miR-380-3p   | JAK2(92) , FYN(91)                         |
| hsa-miR-449c-5p  | MYC(90) , CD40LG(89)                       |
| hsa-miR-510-5p   | MYD88(86) , IL7R(85)                       |
| hsa-miR-548am-5p | KLRD1(88) , EIF2AK2(87)                    |
| hsa-miR-548b-5p  | KLRD1(88) , EIF2AK2(87)                    |
| hsa-miR-548c-5p  | KLRD1(88) , EIF2AK2(87)                    |
| hsa-miR-548d-5p  | KLRD1(88) , EIF2AK2(87)                    |
| hsa-miR-548h-5p  | KLRD1(88) , EIF2AK2(87)                    |
| hsa-miR-548j-5p  | KLRD1(88) , EIF2AK2(87)                    |
| hsa-miR-548o-5p  | KLRD1(88) , EIF2AK2(87)                    |
| hsa-miR-582-5p   | CD40LG(88) , MAPK14(81)                    |
| hsa-miR-629-3p   | ITGAX(93) , MAPK14(87)                     |
| hsa-miR-653-3p   | IRF1(90) , ITGAX(86)                       |
| hsa-let-7f-5p    | CCR7(82)                                   |
| hsa-miR-122-5p   | CD40LG(97)                                 |
| hsa-miR-124-3p   | MAPK14(94)                                 |
| hsa-miR-125a-3p  | IFIT2(89)                                  |
| hsa-miR-128-3p   | MAPK14(94)                                 |
| hsa-miR-1285-3p  | IFI35(82)                                  |
| hsa-miR-129-5p   | STAT5B(81)                                 |
| hsa-miR-135a-5p  | JAK2(82)                                   |
| hsa-miR-135b-5p  | JAK2(82)                                   |
| hsa-miR-142-5p   | CD69(88)                                   |
| hsa-miR-145-3p   | GZMK(88)                                   |
| hsa-miR-150-3p   | FYN(89)                                    |
| hsa-miR-150-5p   | ITGAX(92)                                  |
| hsa-miR-154-5p   | IFIT2(89)                                  |
| hsa-miR-16-2-3p  | IFIT2(87)                                  |
| hsa-miR-181a-5p  | CD69(80)                                   |
| hsa-miR-181b-5p  | CD69(80)                                   |
| hsa-miR-181c-3p  | CD69(85)                                   |
| hsa-miR-181c-5p  | CD69(80)                                   |

|                   |              |
|-------------------|--------------|
| hsa-miR-181d-5p   | CD69(80)     |
| hsa-miR-183-5p    | KLRD1(89)    |
| hsa-miR-197-3p    | JAK2(86)     |
| hsa-miR-19a-3p    | MAPK14(89)   |
| hsa-miR-19b-3p    | MAPK14(89)   |
| hsa-miR-203a-3p   | IFIT3(83)    |
| hsa-miR-216a-5p   | JAK2(91)     |
| hsa-miR-219a-1-3p | JAK2(92)     |
| hsa-miR-22-3p     | MAPK14(89)   |
| hsa-miR-23a-3p    | STAT5B(97)   |
| hsa-miR-23b-3p    | STAT5B(97)   |
| hsa-miR-24-3p     | STAT2(85)    |
| hsa-miR-25-3p     | CD69(100)    |
| hsa-miR-27a-3p    | MAPK14(89)   |
| hsa-miR-27b-3p    | MAPK14(89)   |
| hsa-miR-3065-5p   | LTF(92)      |
| hsa-miR-3117-3p   | CD274(93)    |
| hsa-miR-3121-3p   | CD274(95)    |
| hsa-miR-3152-3p   | CD40LG(97)   |
| hsa-miR-32-5p     | CD69(100)    |
| hsa-miR-320b      | CD274(92)    |
| hsa-miR-320c      | CD274(92)    |
| hsa-miR-320d      | CD274(92)    |
| hsa-miR-330-3p    | IL7R(86)     |
| hsa-miR-337-3p    | JAK2(93)     |
| hsa-miR-338-5p    | TLR4(88)     |
| hsa-miR-342-3p    | ITGAM(82)    |
| hsa-miR-361-3p    | FYN(83)      |
| hsa-miR-363-3p    | CD69(100)    |
| hsa-miR-365a-3p   | KLRD1(88)    |
| hsa-miR-365b-3p   | KLRD1(88)    |
| hsa-miR-367-3p    | CD69(100)    |
| hsa-miR-371a-5p   | IFIT2(80)    |
| hsa-miR-377-3p    | CD274(84)    |
| hsa-miR-381-3p    | FYN(84)      |
| hsa-miR-383-5p    | IRF1(83)     |
| hsa-miR-409-3p    | IFIT2(90)    |
| hsa-miR-424-5p    | CD3E(81)     |
| hsa-miR-431-5p    | CD69(86)     |
| hsa-miR-432-5p    | CCR7(86)     |
| hsa-miR-448       | TLR4(93)     |
| hsa-miR-450a-1-3p | STAT1(89)    |
| hsa-miR-450a-2-3p | CD69(91)     |
| hsa-miR-4713-5p   | ITGAX(88)    |
| hsa-miR-486-3p    | IL2RB(87)    |
| hsa-miR-486-5p    | CD247(93)    |
| hsa-miR-495-3p    | STAT1(86)    |
| hsa-miR-497-3p    | IL7R(85)     |
| hsa-miR-497-5p    | CD3E(81)     |
| hsa-miR-506-3p    | MAPK14(94)   |
| hsa-miR-513a-3p   | KLRD1(88)    |
| hsa-miR-513c-3p   | KLRD1(88)    |
| hsa-miR-548an     | CD69(83)     |
| hsa-miR-5571-5p   | KLRD1(87)    |
| hsa-miR-568       | JAK2(92)     |
| hsa-miR-589-3p    | HSP90AB1(94) |
| hsa-miR-627-3p    | TLR4(89)     |
| hsa-miR-633       | EIF2AK2(93)  |
| hsa-miR-654-5p    | CD2(87)      |

|                |            |
|----------------|------------|
| hsa-miR-656-3p | FYN(86)    |
| hsa-miR-660-5p | CD8A(87)   |
| hsa-miR-661    | KLRD1(85)  |
| hsa-miR-665    | STAT2(88)  |
| hsa-miR-802    | CD274(82)  |
| hsa-miR-873-3p | CD40LG(90) |
| hsa-miR-876-3p | IFIT3(92)  |
| hsa-miR-92a-3p | CD69(100)  |
| hsa-miR-92b-3p | CD69(100)  |
| hsa-miR-939-3p | KLRD1(80)  |

**Supplementary Table S6.** Comprehensive list of miRNAs targeting hub genes of the PPI network of UC.

| miRNA             | Gene Symbols (target score) |
|-------------------|-----------------------------|
| hsa-miR-150-5p    | TNF(87) , CD38(81)          |
| hsa-miR-15a-5p    | IL7R(82) , CD3E(81)         |
| hsa-miR-15b-5p    | IL7R(82) , CD3E(81)         |
| hsa-miR-16-5p     | IL7R(82) , CD3E(81)         |
| hsa-miR-181a-5p   | TNF(86) , CD69(80)          |
| hsa-miR-181b-5p   | TNF(86) , CD69(80)          |
| hsa-miR-181c-5p   | TNF(86) , CD69(80)          |
| hsa-miR-181d-5p   | TNF(86) , CD69(80)          |
| hsa-miR-195-5p    | IL7R(82) , CD3E(81)         |
| hsa-miR-510-5p    | MYD88(86) , IL7R(85)        |
| hsa-miR-513a-3p   | KLRD1(88) , CD38(82)        |
| hsa-miR-513c-3p   | KLRD1(88) , CD38(82)        |
| hsa-miR-105-5p    | CD40LG(88)                  |
| hsa-miR-106a-5p   | CD69(91)                    |
| hsa-miR-106b-5p   | CD69(93)                    |
| hsa-miR-122-5p    | CD40LG(97)                  |
| hsa-miR-130a-3p   | CD69(91)                    |
| hsa-miR-130b-3p   | CD69(93)                    |
| hsa-miR-142-5p    | CD69(88)                    |
| hsa-miR-145-3p    | GZMK(88)                    |
| hsa-miR-17-5p     | CD69(91)                    |
| hsa-miR-181c-3p   | CD69(85)                    |
| hsa-miR-183-5p    | KLRD1(89)                   |
| hsa-miR-204-5p    | IL7R(96)                    |
| hsa-miR-20a-5p    | CD69(93)                    |
| hsa-miR-20b-5p    | CD69(91)                    |
| hsa-miR-211-5p    | IL7R(96)                    |
| hsa-miR-25-3p     | CD69(100)                   |
| hsa-miR-2682-5p   | CD40LG(85)                  |
| hsa-miR-301a-3p   | CD69(91)                    |
| hsa-miR-301b-3p   | CD69(91)                    |
| hsa-miR-3065-5p   | LTF(92)                     |
| hsa-miR-3121-3p   | TNF(86)                     |
| hsa-miR-3152-3p   | CD40LG(97)                  |
| hsa-miR-3173-3p   | CD38(83)                    |
| hsa-miR-32-5p     | CD69(100)                   |
| hsa-miR-328-3p    | PRF1(82)                    |
| hsa-miR-330-3p    | IL7R(86)                    |
| hsa-miR-338-5p    | TLR4(88)                    |
| hsa-miR-342-3p    | ITGAM(82)                   |
| hsa-miR-34a-3p    | TNF(96)                     |
| hsa-miR-34b-5p    | CD40LG(89)                  |
| hsa-miR-363-3p    | CD69(100)                   |
| hsa-miR-365a-3p   | KLRD1(88)                   |
| hsa-miR-365b-3p   | KLRD1(88)                   |
| hsa-miR-367-3p    | CD69(100)                   |
| hsa-miR-424-5p    | CD3E(81)                    |
| hsa-miR-431-5p    | CD69(86)                    |
| hsa-miR-448       | TLR4(93)                    |
| hsa-miR-449c-5p   | CD40LG(89)                  |
| hsa-miR-450a-2-3p | CD69(91)                    |
| hsa-miR-452-3p    | TNF(84)                     |
| hsa-miR-454-3p    | CD69(93)                    |
| hsa-miR-497-3p    | IL7R(85)                    |
| hsa-miR-497-5p    | CD3E(81)                    |
| hsa-miR-519d-3p   | CD69(91)                    |

|                  |            |
|------------------|------------|
| hsa-miR-548am-5p | KLRD1(88)  |
| hsa-miR-548an    | CD69(83)   |
| hsa-miR-548b-5p  | KLRD1(88)  |
| hsa-miR-548c-5p  | KLRD1(88)  |
| hsa-miR-548d-5p  | KLRD1(88)  |
| hsa-miR-548h-5p  | KLRD1(88)  |
| hsa-miR-548j-5p  | KLRD1(88)  |
| hsa-miR-548o-5p  | KLRD1(88)  |
| hsa-miR-5571-5p  | KLRD1(87)  |
| hsa-miR-576-5p   | CD38(83)   |
| hsa-miR-582-5p   | CD40LG(88) |
| hsa-miR-627-3p   | TLR4(89)   |
| hsa-miR-654-5p   | CD2(87)    |
| hsa-miR-661      | KLRD1(85)  |
| hsa-miR-664b-3p  | CD38(86)   |
| hsa-miR-873-3p   | CD40LG(90) |
| hsa-miR-92a-3p   | CD69(100)  |
| hsa-miR-92b-3p   | CD69(100)  |
| hsa-miR-93-5p    | CD69(91)   |
| hsa-miR-939-3p   | KLRD1(80)  |
